# Supplementary material
Source: PubMed Central journal article supplement (PMC8107197)
Supplement: NIHMS1646543-supplement-ESI_1.pdf [file NIHMS1646543-supplement-ESI_1.pdf]

# Bacterial Terpenome

## Supplementary Information

Jeffrey D. Rudolf<sup>\*a</sup>, Tyler A. Alsup,<sup>a</sup> Baofu Xu,<sup>a</sup> and Zining Li<sup>a</sup>

<sup>a</sup>Department of Chemistry, University of Florida, Gainesville, Florida 33458, United States

<sup>\*</sup>To whom correspondence should be addressed: Email: jrudolf@chem.ufl.edu

### Table of Contents

|         |                                                             |     |         |                                                   |     |
|---------|-------------------------------------------------------------|-----|---------|---------------------------------------------------|-----|
| 1       | Introduction .....                                          | S3  | 2.6     | Triterpenoids                                     |     |
| 1.1     | Abbreviations.....                                          | S4  | 2.6.1   | Sterols .....                                     | S26 |
| 2       | Terpenoids .....                                            | S5  | 2.6.1   | Hopanoids .....                                   | S27 |
| 2.1     | Hemiterpenoids .....                                        | S5  | 2.6.2   | Miscellaneous triterpenoids.....                  | S28 |
| 2.2     | Monoterpenoids .....                                        | S6  | 2.7     | Sesquiterpenoids .....                            | S29 |
| 2.3     | Sesquiterpenoids                                            |     | 2.8     | Tetraterpenoids                                   |     |
| 2.3.1   | Simple sesquiterpenoids.....                                | S7  | 2.8.1   | Carotenoids .....                                 | S30 |
| 2.3.2   | Cadinanes .....                                             | S8  | 2.8.2   | Other carotenoids .....                           | S31 |
| 2.3.3   | Eudesmanes.....                                             | S9  | 2.8.3   | Norcarotenoids .....                              | S32 |
| 2.3.4   | Germacrane .....                                            | S10 | 3       | Meroterpenoids .....                              | S33 |
| 2.3.5   | Geosmins .....                                              | S11 | 3.1     | Aminocoumarins .....                              | S33 |
| 2.3.6   | Pentalenolactones .....                                     | S12 | 3.2     | Benzastatins .....                                | S34 |
| 2.3.7   | Zizaanes .....                                              | S13 | 3.3     | Indoles                                           |     |
| 2.3.8   | Miscellaneous polycyclic sesquiterpenoids .....             | S14 | 3.3.1   | Simple indoles .....                              | S35 |
| 2.4     | Diterpenoids                                                |     | 3.3.2.1 | Hapalindole-like indole alkaloids group 1 .....   | S36 |
| 2.4.1   | Brasilicardins, phenalinolactones, and tiancilactones ..... | S15 | 3.3.2.2 | Hapalindole-like indole alkaloids groups 2–5..... | S37 |
| 2.4.2   | Cyclooctatins.....                                          | S16 | 3.3.2.3 | Hapalindole-like indole alkaloids groups 6–9..... | S38 |
| 2.4.3   | Cyslabdane .....                                            | S17 | 3.3.3.1 | Xiamycins monomers .....                          | S39 |
| 2.4.4   | Gibberellins.....                                           | S18 | 3.3.3.2 | Xiamycin dimers .....                             | S40 |
| 2.4.5   | Oxaloterpene .....                                          | S19 | 3.3.4   | Miscellaneous polycyclic indoles.....             | S41 |
| 2.4.6.1 | Platensimycin.....                                          | S20 | 3.4     | Nucleobases and nucleosides .....                 | S42 |
| 2.4.6.2 | Platencin .....                                             | S21 | 3.5     | Peptides                                          |     |
| 2.4.7   | Terpentecins .....                                          | S22 | 3.5.1.1 | Ribosomal peptides: ComX .....                    | S43 |
| 2.4.8   | Miscellaneous diterpenoids.....                             | S23 | 3.5.1.2 | Ribosomal peptides: Linear cyanobactins .....     | S44 |
| 2.4.9   | Heterologously expressed diterpenoids .....                 | S24 | 3.5.1.2 | Ribosomal peptides: Cyclic cyanobactins.....      | S45 |
| 2.5     | Sesterterpenoids .....                                      | S25 | 3.5.2   | Nonribosomal peptides.....                        | S46 |

|         |                                |     |
|---------|--------------------------------|-----|
| 3.5.3   | Teleocidins.....               | S48 |
| 3.5.4   | Diketopiperazines.....         | S50 |
| 3.6     | Phenazines.....                | S51 |
| 3.7     | Phenols.....                   | S53 |
| 3.8     | Polyketides                    |     |
| 3.8.1   | Flavonoids.....                | S55 |
| 3.8.2   | Furaquinocins.....             | S56 |
| 3.8.3.1 | Napyradiomycins type A.....    | S57 |
| 3.8.3.2 | Napyradiomycins type B.....    | S58 |
| 3.8.3.3 | Napyradiomycins type C.....    | S59 |
| 3.8.4   | Naphterpins.....               | S60 |
| 3.8.5   | Merochlorins.....              | S61 |
| 3.8.6   | Miscellaneous polyketides..... | S62 |

|        |                          |     |
|--------|--------------------------|-----|
| 3.9    | Pyrroles.....            | S63 |
| 3.10   | Quinolines.....          | S64 |
| 3.11   | Quinones                 |     |
| 3.11.1 | Benzoquinones.....       | S65 |
| 3.11.2 | Naphthoquinones.....     | S66 |
| 3.12   | Miscellaneous            |     |
| 3.12.1 | Dibenzodiazepinones..... | S67 |
| 3.12.2 | Flavins.....             | S68 |
| 3.12.3 | Phosphoglycolipids.....  | S69 |
| 3.12.4 | Saccharides.....         | S70 |
| 3.12.5 | Chlorophylls.....        | S71 |
| 3.12.6 | Hemes.....               | S72 |

## **1 Introduction**

The Supplementary Information associated with this review article consists of two parts. The first file is a spreadsheet that contains a comprehensive table of all bacterial terpenoids that were found in NP databases or primary literature. Along with the names and associated compound numbers, this spreadsheet contains additional information including molecular formulas and weights, accurate masses, chemical identifiers (SMILES, InChIKey, InChI), genus and species names, isolation reference DOI or URL, discovery year, and

what NP database, if any, these compounds were found in. This spreadsheet was also submitted for deposition into the Natural Products Atlas.

The second file is this document and contains the structures of all of the bacterial terpenoids. In the main review document, only selected structures are shown. Compound numbers are shown under each NP; their names are fully listed in the accompanying spreadsheet. A list of abbreviations used in the main review document is also included in this file.

## 1.1 Abbreviations

ADHBA; 3-amino-2,4-dihydrobenzoic acid  
ADHBSH; thiocarboxylic acid analogue of ADHBA  
ATP; adenosine triphosphate  
BChl; bacteriochlorophyll  
BGC; biosynthetic gene cluster  
CDPS; cyclodipeptide synthase  
Chl; chlorophyll  
CLPP; cyclolavandulyl diphosphate  
CPP; copalyl diphosphate  
DKP; 2,5-diketopiperazine  
DMAPP; dimethylallyl diphosphate  
DMK; dimethylmenaquinone  
FPP; farnesyl diphosphate  
FMN; flavin mononucleotide  
GA; gibberellins  
GAPDH; glyceraldehyde-3-phosphate dehydrogenase  
GFPP; geranylarnesyl diphosphate  
GGPP; geranylgeranyl diphosphate  
GPP; geranyl diphosphate  
HIF; hypoxia-induced factor  
Hsp; heat shock protein  
IL; interleukin  
IPP; isopentenyl diphosphate  
KG; ketoglutarate  
LPP; linalyl diphosphate  
MAPK; mitogen-activated protein kinase  
MEP; methylerythritol phosphate  
MIB; methylisoborneol  
MIC; minimum inhibitory concentration  
MK; menaquinone  
MRSA; methicillin-resistant *Staphylococcus aureus*  
MT; methyltransferase  
MVA; mevalonate  
NO; nitric oxide  
NP; natural products  
NPP; nerolidyl diphosphate  
NRPS; non-ribosomal peptide synthetase  
PABA; *p*-aminobenzoic acid  
PCA; phenazincarboxylic acid  
PG; phosphoglycerate  
PKC; protein kinase C  
PKS; polyketide synthase  
PNT; pentalenolactone  
PQ; plastoquinone  
PT; prenyltransferase  
PTM; platensimycin  
PTN; platencin  
RIPP; ribosomally-synthesized and posttranslationally-modified peptide  
ROS; reactive oxygen species  
RQ; rhodoquinone  
SAM; *S*-adenosylmethionine  
SAR; structure-activity relationship  
SARS-CoV2; severe acute respiratory syndrome–coronavirus 2  
THF; tetrahydrofuran  
THN; 1,3,6,8-tetrahydroxynaphthalene  
TIM; triosephosphate isomerase  
TNF; tumor necrosis factor  
TQ; tocopherolquinone  
TRX; thioredoxin  
TS; terpene synthase  
VHPO; vanadium-dependent haloperoxidases  
VOC; volatile organic compound  
VRE; vancomycin-resistant Enterococci  
WT; wild-type

## 2 Terpenoids

### 2.1 Hemiterpenoids

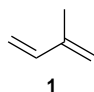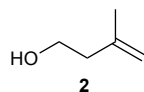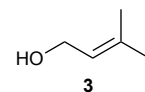

## 2.2 Monoterpenoids

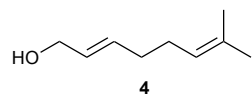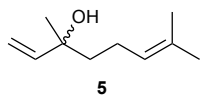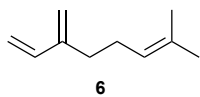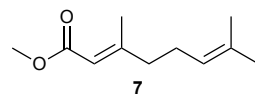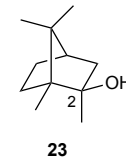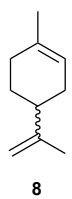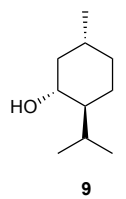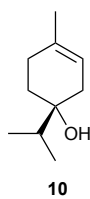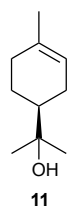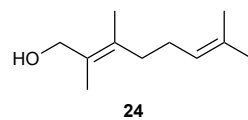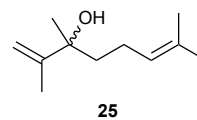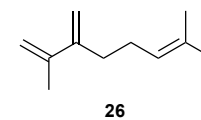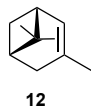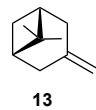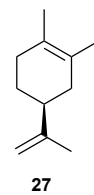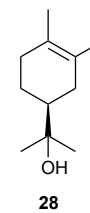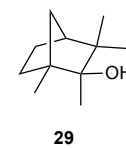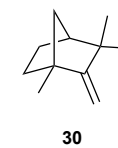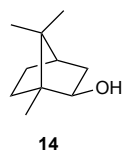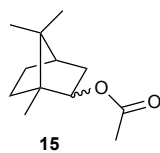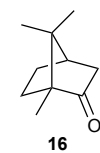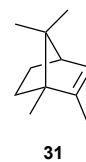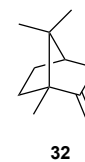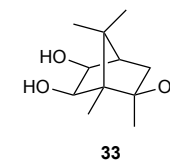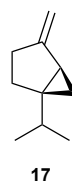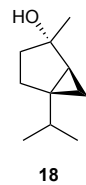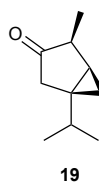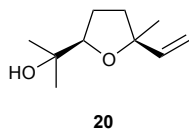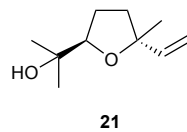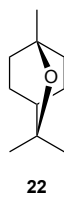

2.3.1 Sesquiterpenoids: Simple sesquiterpenoids

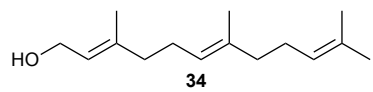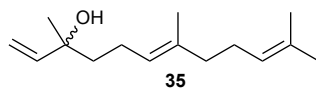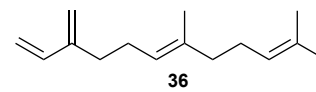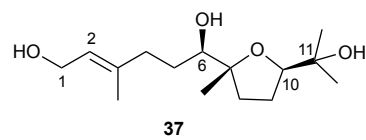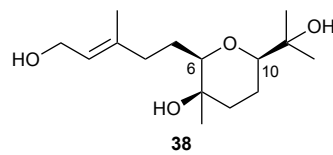

### 2.3.2 Sesquiterpenoids: Cadinanes

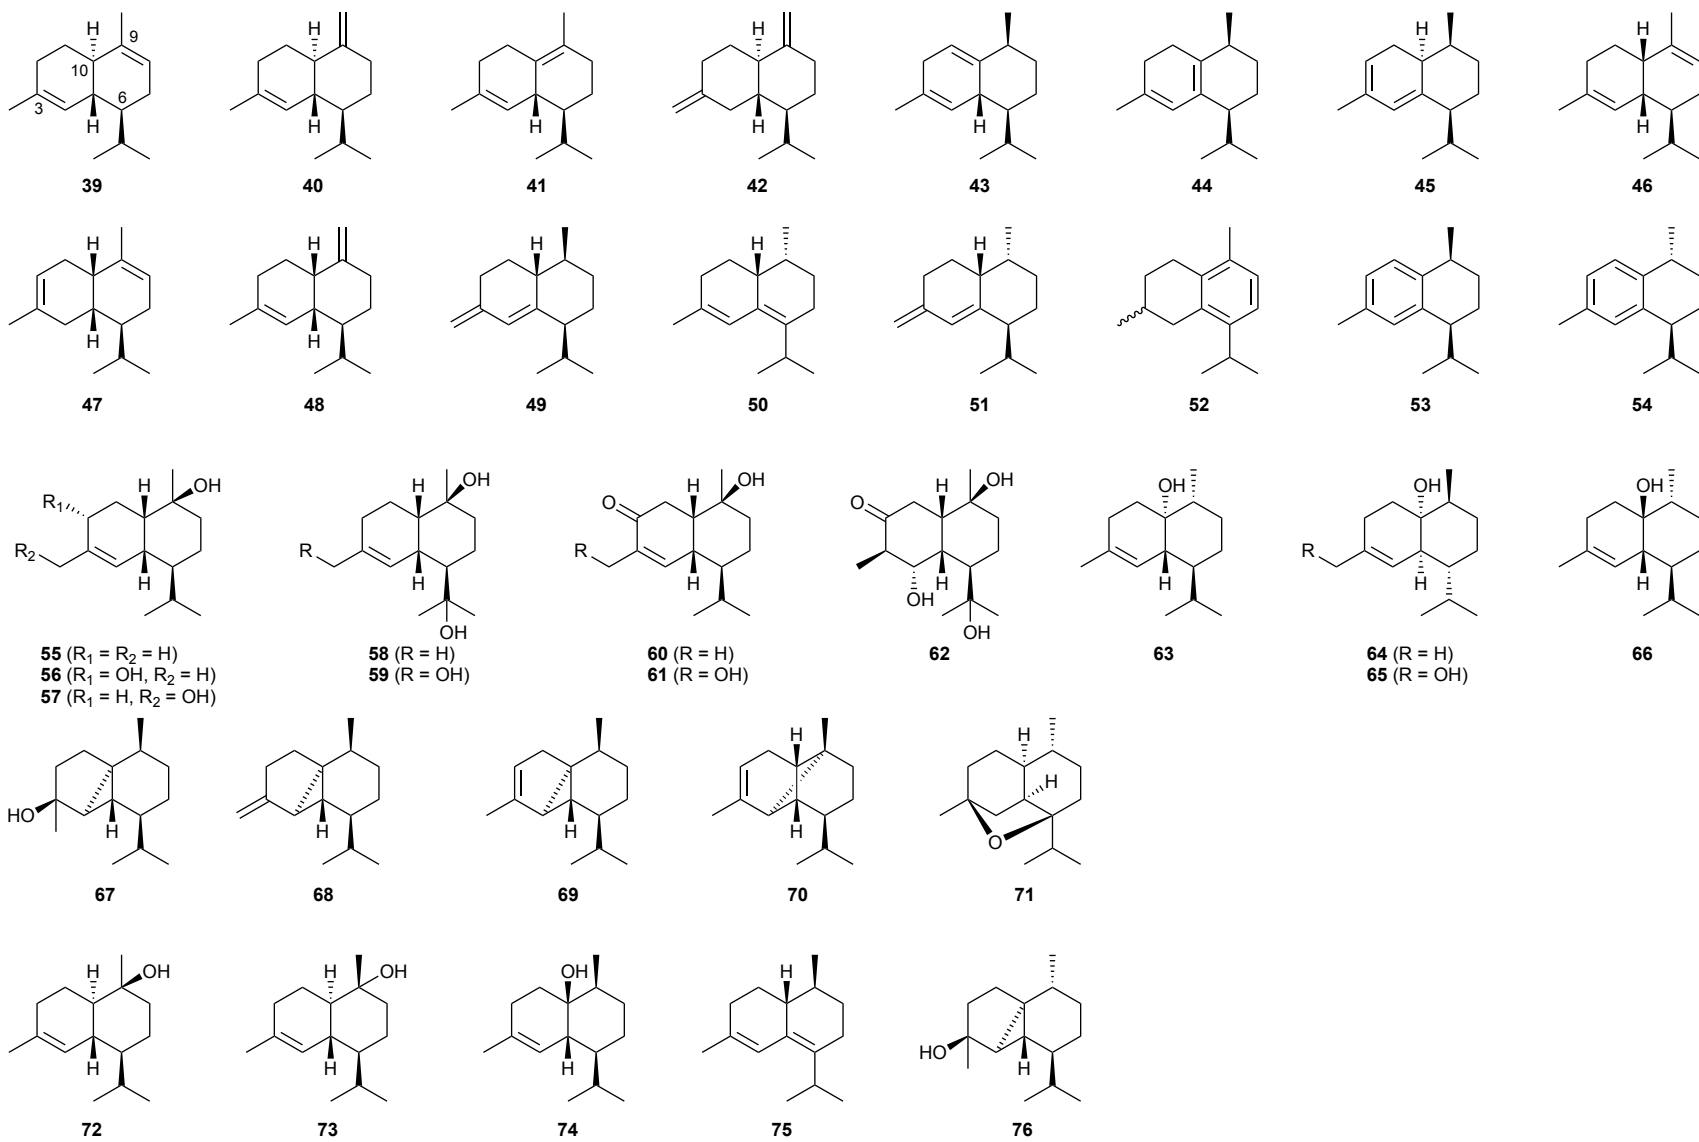



### 2.3.3 Sesquiterpenoids: Eudesmanes

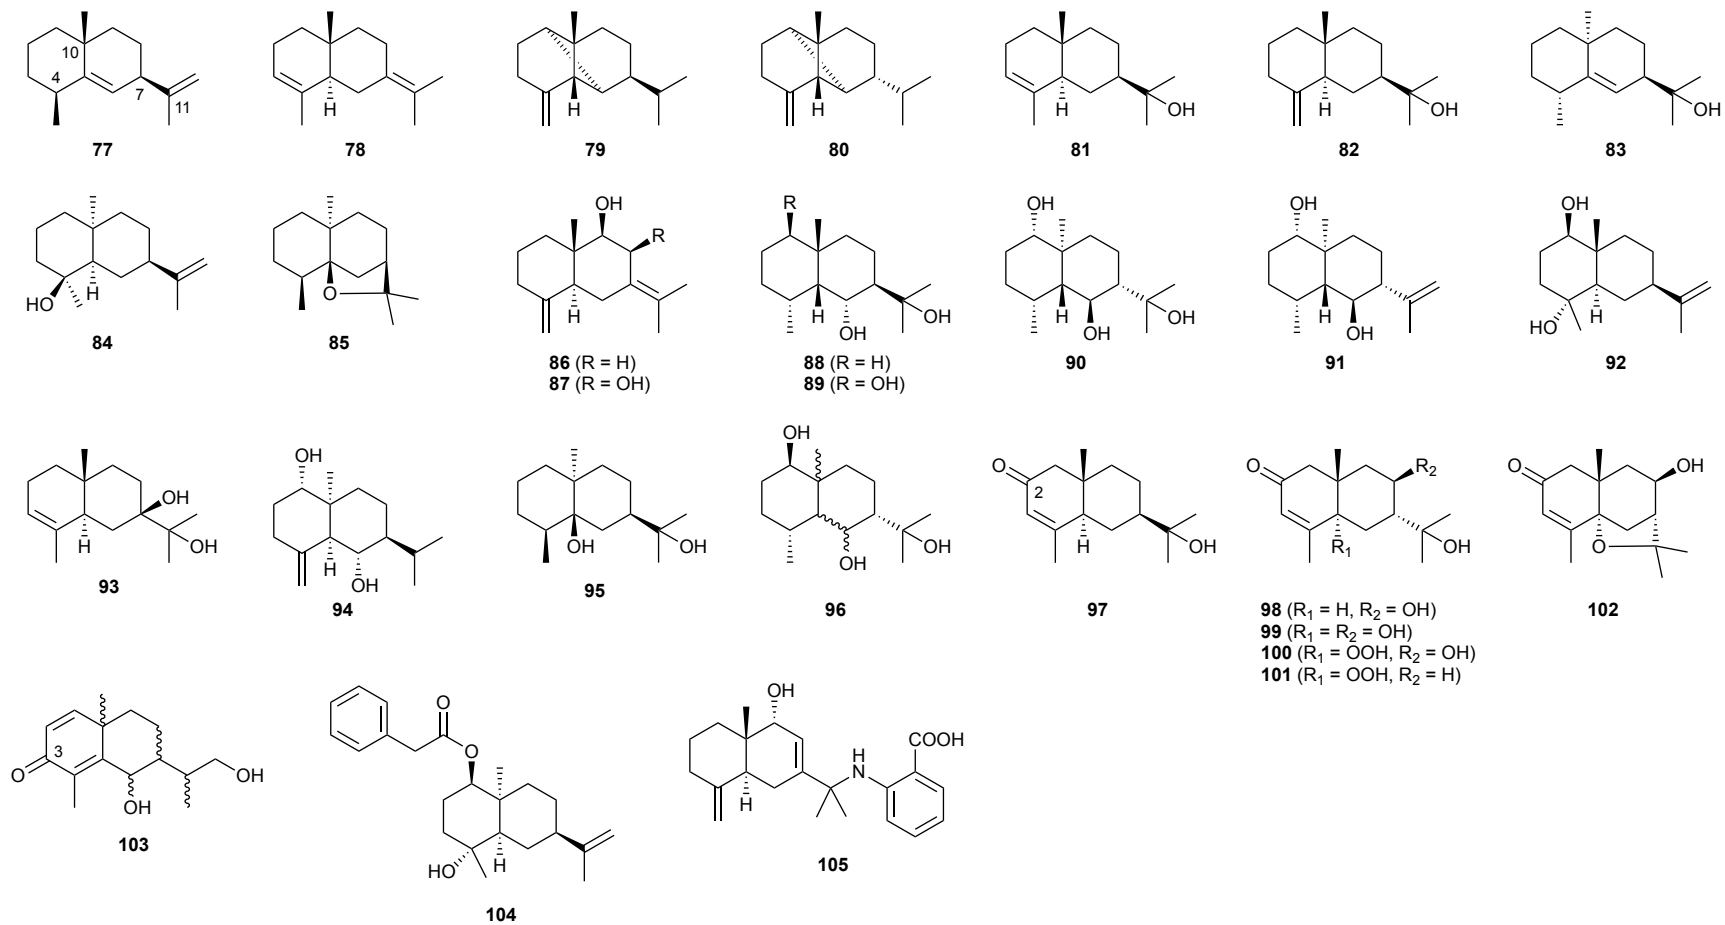

2.3.4 Sesquiterpenoids: Germacranes

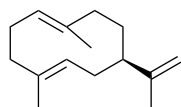

106

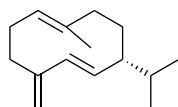

107

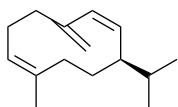

108

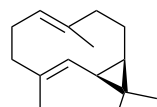

109

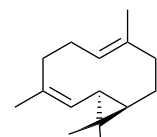

110

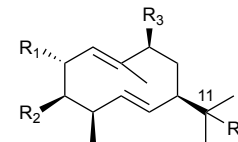

111 ( $R_1 = R_2 = R_3 = H, R_4 = OH$ )

112 ( $R_1 = R_4 = OH, R_2 = R_3 = H$ )

113 ( $R_1 = R_3 = H, R_2 = R_4 = OH$ )

114 ( $R_1 = R_2 = H, R_3 = R_4 = OH$ )

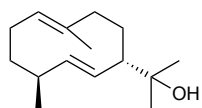

115

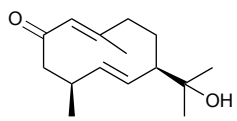

116

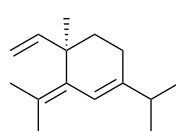

117

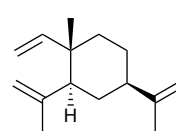

118

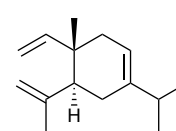

119

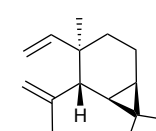

120

### 2.3.5 Sesquiterpenoids: Geosmins

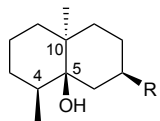

**121** (R = H)  
**129** (R = OH)

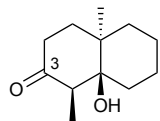

**122**

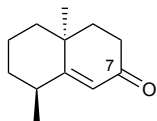

**123**

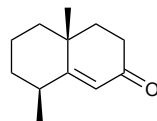

**124**

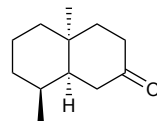

**125**

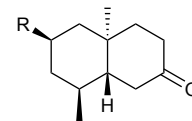

**126** (R = H)  
**130** (R = OH)

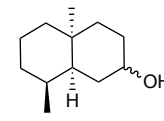

**127/128**

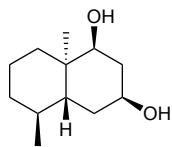

**131**

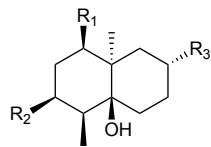

**132** (R<sub>1</sub> = OH, R<sub>2</sub> = R<sub>3</sub> = H)  
**133** (R<sub>1</sub> = R<sub>3</sub> = H, R<sub>2</sub> = OH)  
**134** (R<sub>1</sub> = R<sub>3</sub> = OH, R<sub>2</sub> = H)

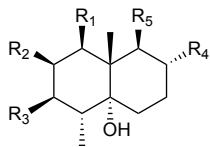

**135** (R<sub>1</sub> = R<sub>3</sub> = R<sub>4</sub> = OH, R<sub>2</sub> = R<sub>5</sub> = H)  
**136** (R<sub>1</sub> = R<sub>3</sub> = R<sub>4</sub> = H, R<sub>2</sub> = R<sub>5</sub> = OH)

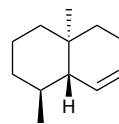

**137**

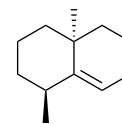

**138**

### 2.3.6 Sesquiterpenoids: Pentalenolactones

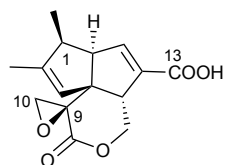

139

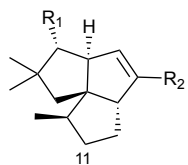

140 ( $R_1 = R_2 = H$ )  
144 ( $R_1 = OH, R_2 = COOH$ )

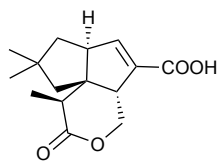

141

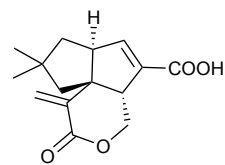

142

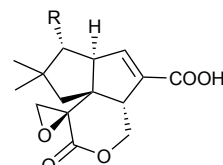

143 ( $R = H$ )  
149 ( $R = OH$ )

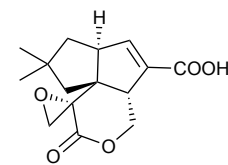

145

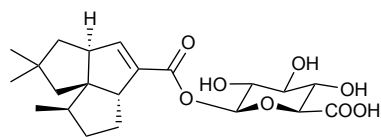

146

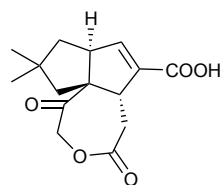

147

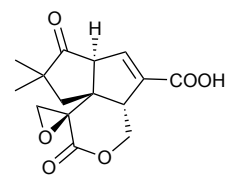

148

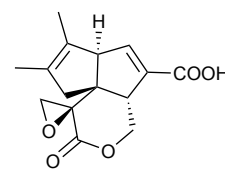

150

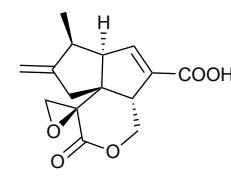

151

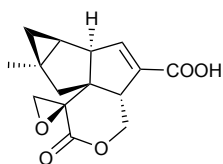

152

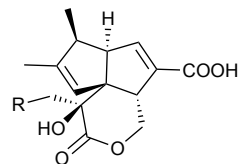

153 ( $R = Cl$ )  
154 ( $R = OH$ )

**2.3.7 Sesquiterpenoids: Zizaenes**

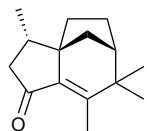

**155**

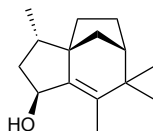

**156**

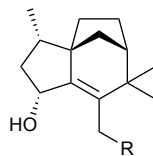

**157 (R = H)**  
**158 (R = OH)**

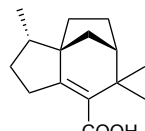

**159**

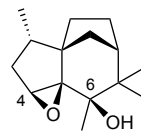

**160**

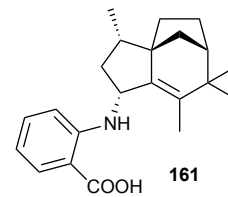

**161**

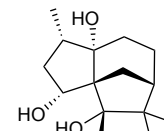

**162**

2.3.8 Sesquiterpenoids: Miscellaneous polycyclic sesquiterpenoids

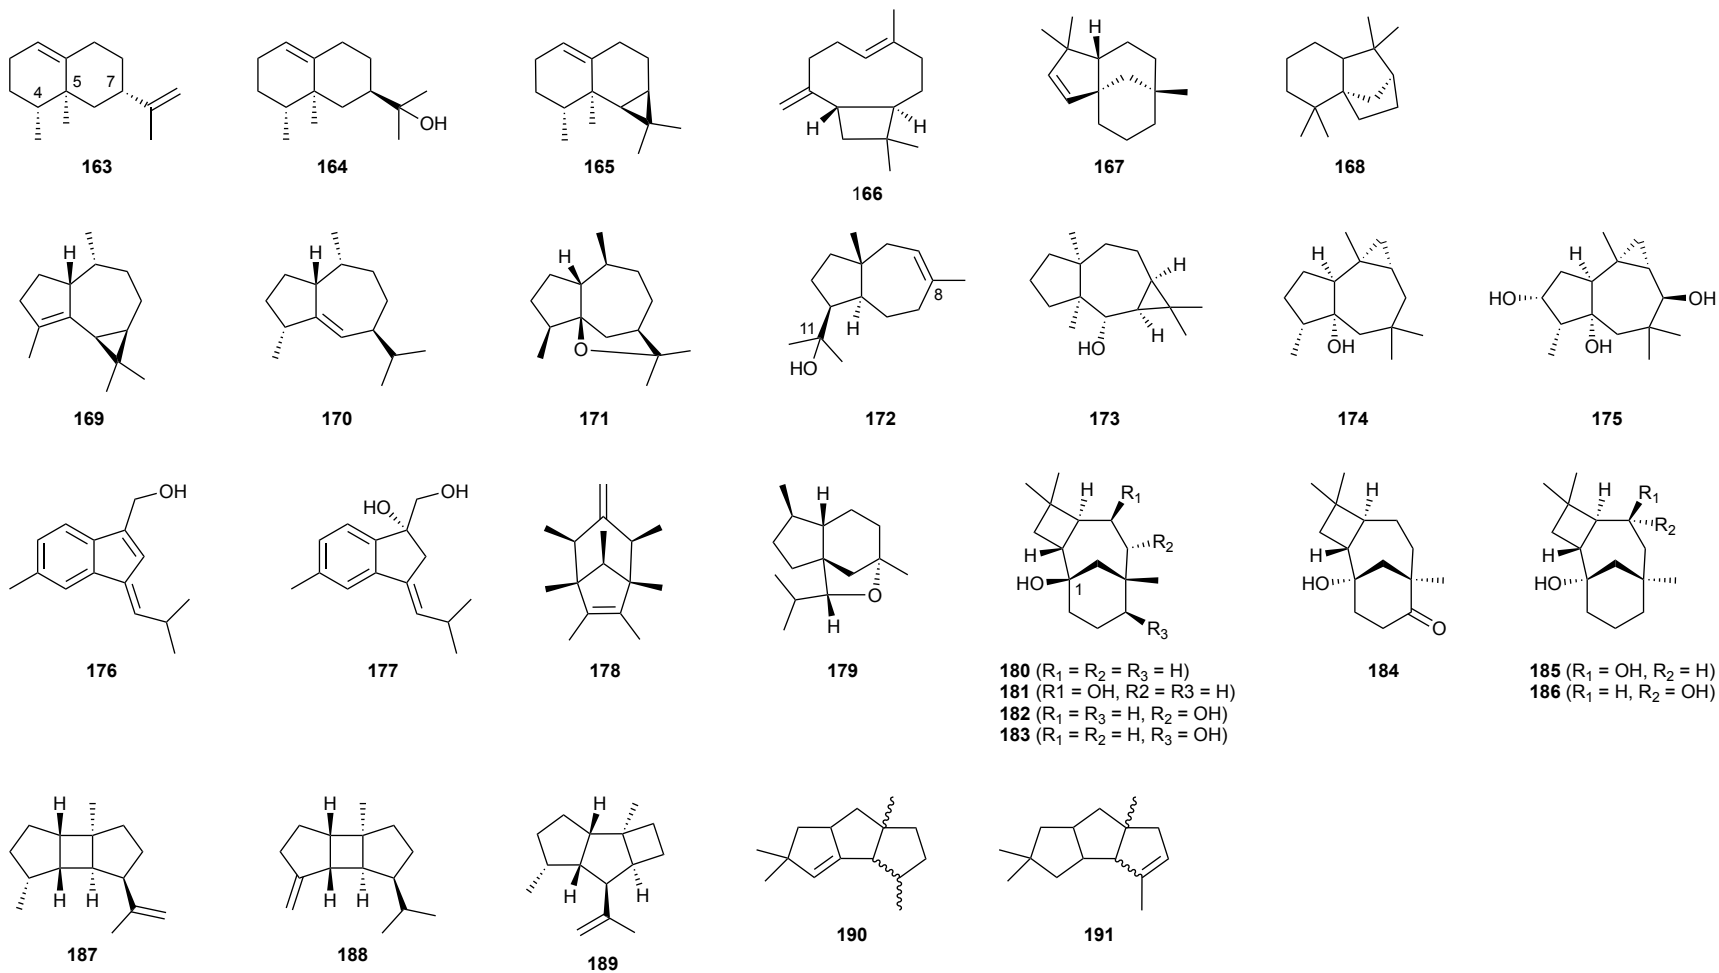



## 2.4.2 Diterpenoids: Cyclooctatins

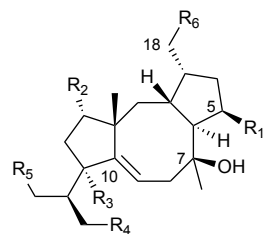

- 214** ( $R_1 = R_6 = \text{OH}, R_2 = R_3 = R_4 = R_5 = \text{H}$ )  
**215** ( $R_1 = R_3 = R_6 = \text{OH}, R_2 = R_4 = R_5 = \text{H}$ )  
**216** ( $R_1 = R_2 = R_6 = \text{OH}, R_3 = R_4 = R_5 = \text{H}$ )  
**217** ( $R_1 = R_4 = R_6 = \text{OH}, R_2 = R_3 = R_5 = \text{H}$ )  
**218** ( $R_1 = R_4 = R_5 = R_6 = \text{OH}, R_2 = R_3 = \text{H}$ )  
**219** ( $R_1 = R_2 = R_3 = R_4 = R_5 = R_6 = \text{H}$ )  
**220** ( $R_1 = R_2 = R_3 = R_4 = R_5 = \text{H}, R_6 = \text{OH}$ )

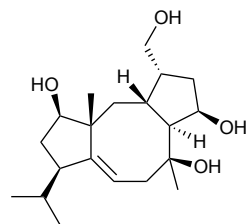

**221**

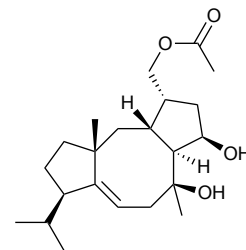

**222**

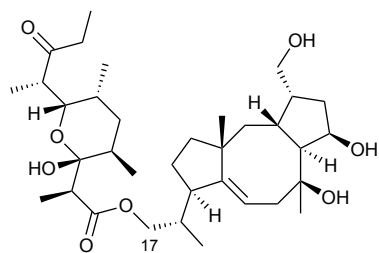

**223**

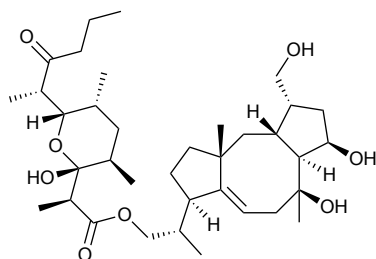

**224**

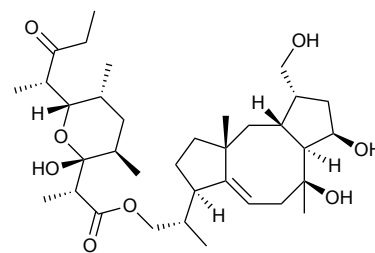

**225**



### 2.4.3 Diterpenoids: Cyslabdans

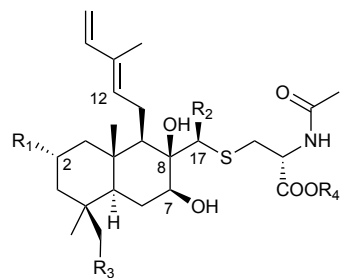

- 226** ( $R_1 = R_2 = R_3 = R_4 = H$ )  
**227** ( $R_1 = R_2 = R_4 = H$ ,  $R_3 = OH$ )  
**228** ( $R_1 = R_2 = R_3 = H$ ,  $R_4 = CH_3$ )  
**229** ( $R_1 = OH$ ,  $R_2 = R_3 = R_4 = H$ )  
**230** ( $R_1 = R_3 = R_4 = H$ ,  $R_2 = OH$ )

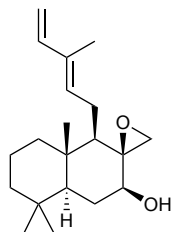

**231**

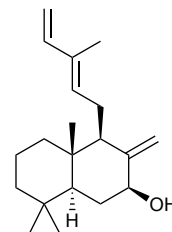

**232**

### 2.4.4 Diterpenoids: Gibberellins

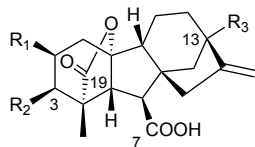

- 233** ( $R_1 = H, R_2 = R_3 = OH$ )  
**234** ( $R_1 = R_3 = H, R_2 = OH$ )  
**235** ( $R_1 = R_2 = R_3 = H$ )  
**236** ( $R_1 = R_2 = H, R_3 = OH$ )  
**237** ( $R_1 = R_2 = R_3 = OH$ )  
**238** ( $R_1 = R_2 = OH, R_3 = H$ )

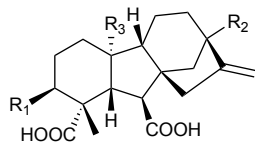

- 239** ( $R_1 = R_2 = H, R_3 = CH_3$ )  
**240** ( $R_1 = H, R_2 = OH, R_3 = CHO$ )  
**241** ( $R_1 = R_2 = H, R_3 = CHO$ )  
**242** ( $R_1 = OH, R_2 = H, R_3 = CHO$ )  
**243** ( $R_1 = H, R_2 = OH, R_3 = CH_2OH$ )  
**244** ( $R_1 = H, R_2 = OH, R_3 = CH_3$ )

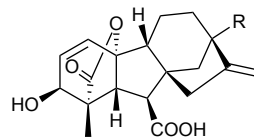

- 245** ( $R = OH$ )  
**246** ( $R = H$ )

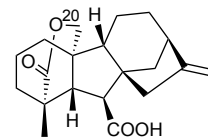

**247**

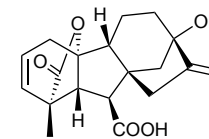

**248**

## 2.4.5 Diterpenoids: Oxaloterpins

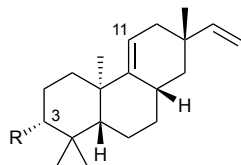

249 (R = OH)  
250 (R = H)

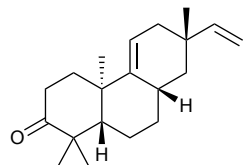

251

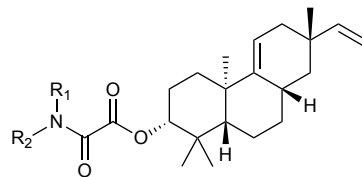

252 (R<sub>1</sub> = OH, R<sub>2</sub> = Ac)  
253 (R<sub>1</sub> = OH, R<sub>2</sub> = CH<sub>2</sub>CH<sub>2</sub>OH)  
254 (R<sub>1</sub> = OH, R<sub>2</sub> = H)  
255 (R<sub>1</sub> = R<sub>2</sub> = H)

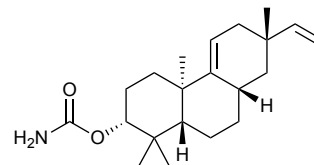

256

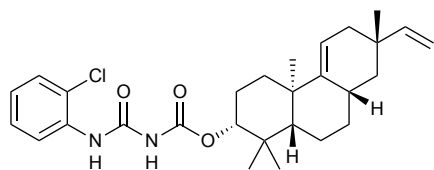

257

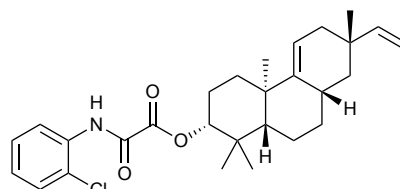

258

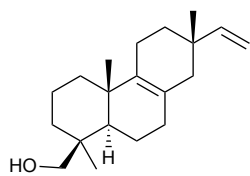

259

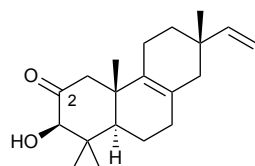

260

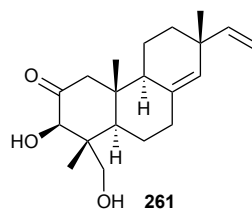

261

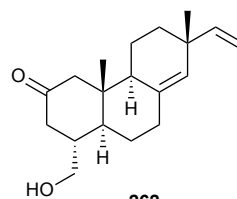

262

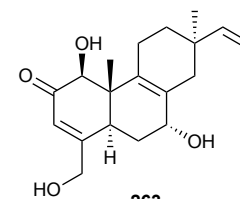

263

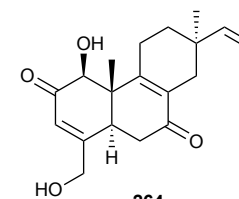

264

### 2.4.6.1 Diterpenoids: Platensimycin

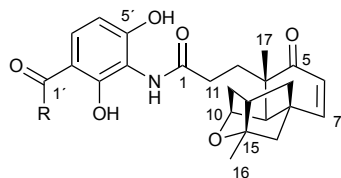

**265** (R = OH)  
**268** (R = NH<sub>2</sub>)  
**278** (R = SH)  
**280** (R = OCH<sub>3</sub>)

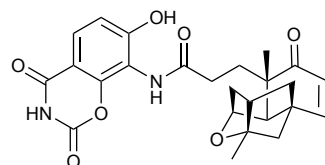

**269**

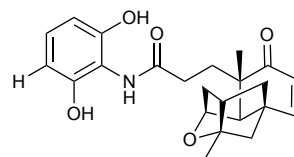

**270**

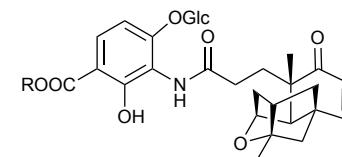

**271** (R = H)  
**272** (R = CH<sub>3</sub>)

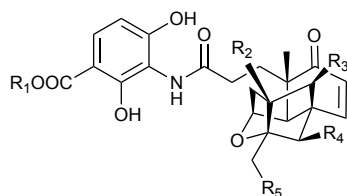

**283** (R<sub>1</sub> = R<sub>2</sub> = R<sub>3</sub> = R<sub>5</sub> = H, R<sub>4</sub> = OH)  
**284** (R<sub>1</sub> = CH<sub>3</sub>, R<sub>2</sub> = R<sub>3</sub> = R<sub>5</sub> = H, R<sub>4</sub> = OH)  
**285** (R<sub>1</sub> = R<sub>2</sub> = R<sub>4</sub> = R<sub>5</sub> = H, R<sub>3</sub> = OH)  
**286** (R<sub>1</sub> = CH<sub>3</sub>, R<sub>2</sub> = R<sub>4</sub> = R<sub>5</sub> = H, R<sub>3</sub> = OH)  
**287** (R<sub>1</sub> = R<sub>3</sub> = R<sub>4</sub> = R<sub>5</sub> = H, R<sub>2</sub> = OH)  
**288** (R<sub>1</sub> = CH<sub>3</sub>, R<sub>2</sub> = OH, R<sub>3</sub> = R<sub>4</sub> = R<sub>5</sub> = H)  
**289** (R<sub>1</sub> = R<sub>2</sub> = R<sub>3</sub> = R<sub>4</sub> = H, R<sub>5</sub> = OH)  
**290** (R<sub>1</sub> = CH<sub>3</sub>, R<sub>2</sub> = R<sub>3</sub> = R<sub>4</sub> = H, R<sub>5</sub> = OH)

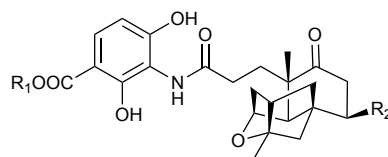

**291** (R<sub>1</sub> = H, R<sub>2</sub> = OH)  
**292** (R<sub>1</sub> = CH<sub>3</sub>, R<sub>2</sub> = OH)

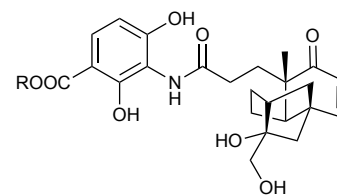

**293** (R = H)  
**294** (R = CH<sub>3</sub>)

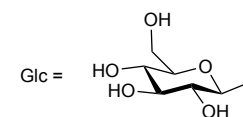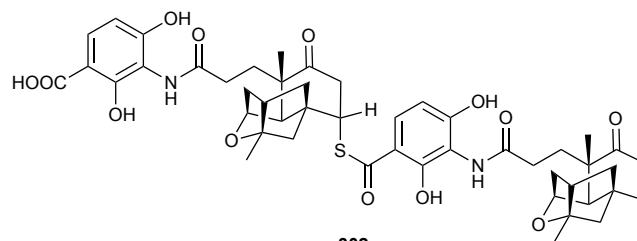

**302**

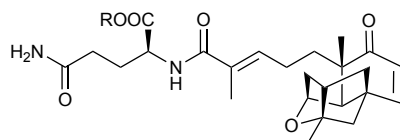

**267** (R = H)  
**308** (R = CH<sub>3</sub>)

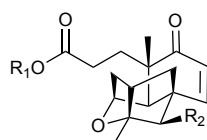

**303** (R<sub>1</sub> = H, R<sub>2</sub> = H)  
**304** (R<sub>1</sub> = CH<sub>3</sub>, R<sub>2</sub> = H)  
**305** (R<sub>1</sub> = H, R<sub>2</sub> = OH)  
**306** (R<sub>1</sub> = Me, R<sub>2</sub> = OH)

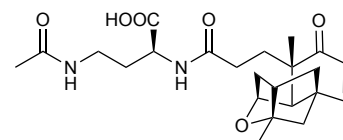

**307**

### 2.4.6.2 Diterpenoids: Platencin

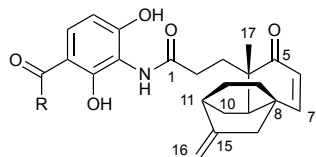

**266** (R = OH)  
**279** (R = SH)

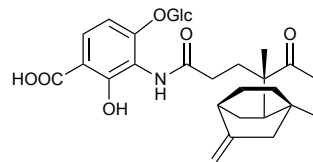

**273**

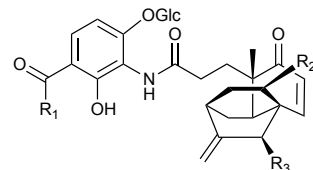

**274** (R<sub>1</sub> = OH, R<sub>2</sub> = H, R<sub>3</sub> = H)  
**275** (R<sub>1</sub> = OH, R<sub>2</sub> = OH, R<sub>3</sub> = H)  
**276** (R<sub>1</sub> = OH, R<sub>2</sub> = H, R<sub>3</sub> = OH)  
**277** (R<sub>1</sub> = SCH<sub>3</sub>, R<sub>2</sub> = OH, R<sub>3</sub> = H)

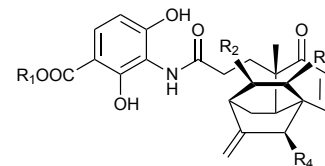

**295** (R<sub>1</sub> = R<sub>2</sub> = R<sub>4</sub> = H, R<sub>3</sub> = OH)  
**296** (R<sub>1</sub> = CH<sub>3</sub>, R<sub>2</sub> = R<sub>4</sub> = H, R<sub>3</sub> = OH)  
**297** (R<sub>1</sub> = R<sub>3</sub> = R<sub>4</sub> = H, R<sub>2</sub> = OH)  
**298** (R<sub>1</sub> = R<sub>2</sub> = R<sub>3</sub> = H, R<sub>4</sub> = OH)

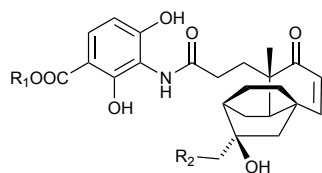

**299** (R<sub>1</sub> = R<sub>2</sub> = H)  
**300** (R<sub>1</sub> = H, R<sub>2</sub> = OH)  
**301** (R<sub>1</sub> = CH<sub>3</sub>, R<sub>2</sub> = OH)

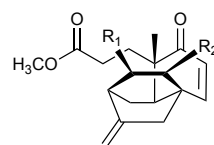

**281** (R<sub>1</sub> = H, R<sub>2</sub> = OH)  
**282** (R<sub>1</sub> = OH, R<sub>2</sub> = H)

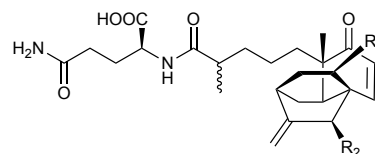

**309** (R<sub>1</sub> = R<sub>2</sub> = H)  
**310** (R<sub>1</sub> = OH, R<sub>2</sub> = H)  
**311** (R<sub>1</sub> = H, R<sub>2</sub> = OH)

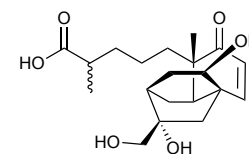

**312**

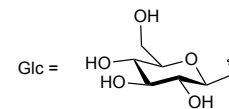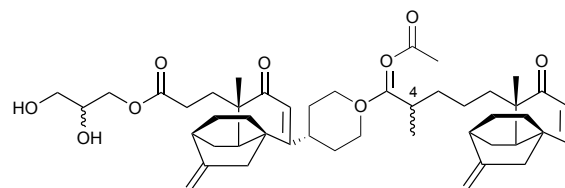

**315**

**316** (4*S*)  
**317** (4*R*)

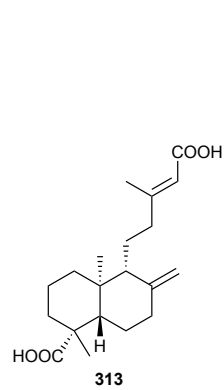

**313**

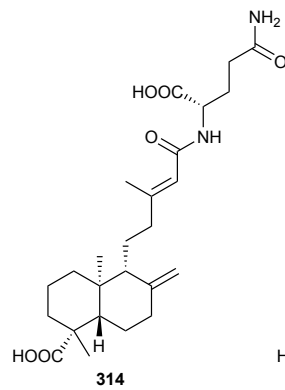

**314**

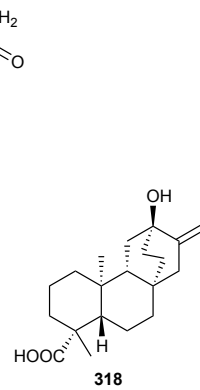

**318**

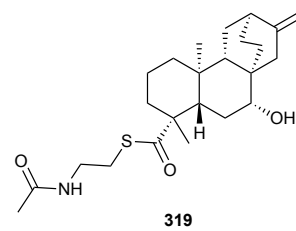

**319**

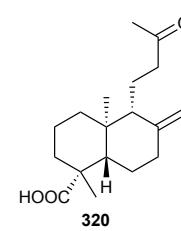

**320**

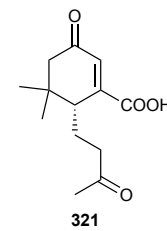

**321**

## 2.4.7 Diterpenoids: Terpentecins

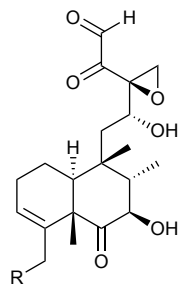

**322** (R = H)  
**323** (R = OH)

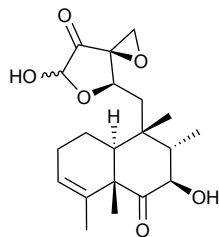

**322** – hemiacetal form

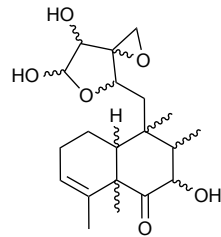

**324**

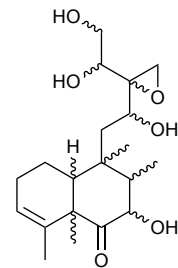

**325**

2.4.8 Diterpenoids: Miscellaneous diterpenoids

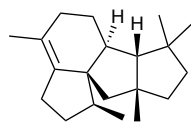

326

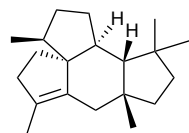

327

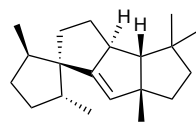

328

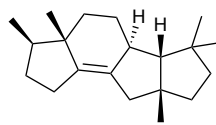

329

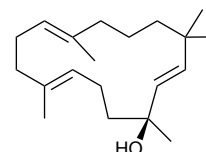

330

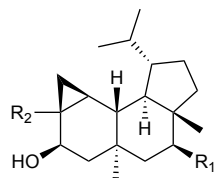

331 (R<sub>1</sub> = H, R<sub>2</sub> = CH<sub>3</sub>)

332 (R<sub>1</sub> = OH, R<sub>2</sub> = CH<sub>3</sub>)

333 (R<sub>1</sub> = H, R<sub>2</sub> = CH<sub>2</sub>OH)

334 (R<sub>1</sub> = OH, R<sub>2</sub> = CH<sub>2</sub>OH)

335 (R<sub>1</sub> = OH, R<sub>2</sub> = CHO)

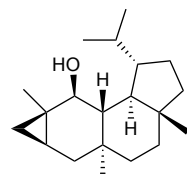

336

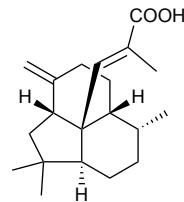

337

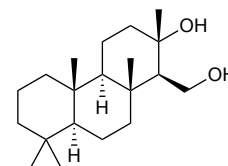

338

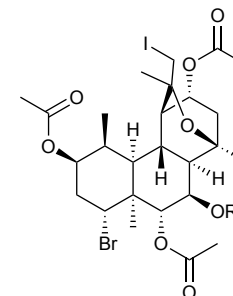

339 (R = H)  
340 (R = Ac)

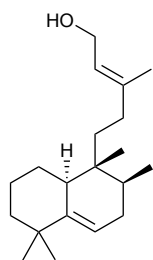

341

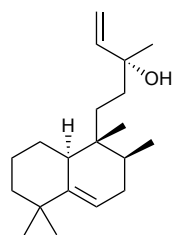

342

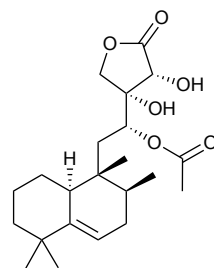

343

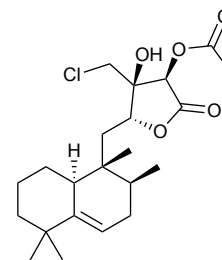

344

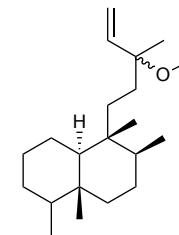

345

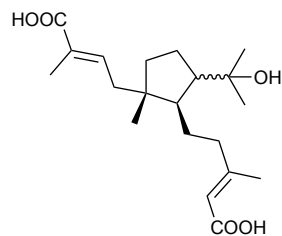

346

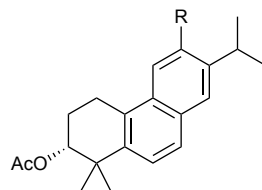

347 (R = H)  
348 (R = OH)

### 2.4.9 Diterpenoids: Heterologously expressed diterpenoids

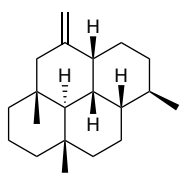

349

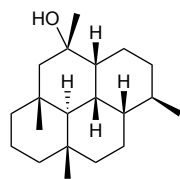

350

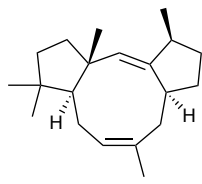

351

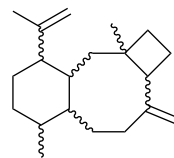

352

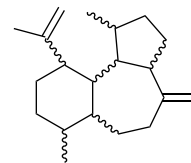

353

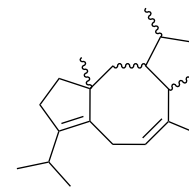

354

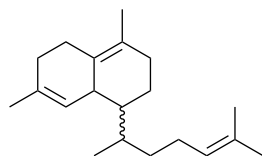

355

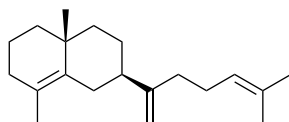

356

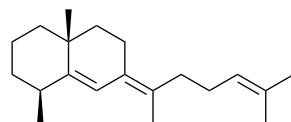

357

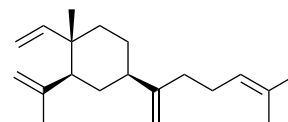

358

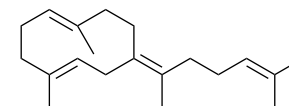

359



## 2.5 Sesterterpenoids

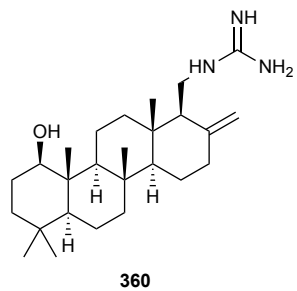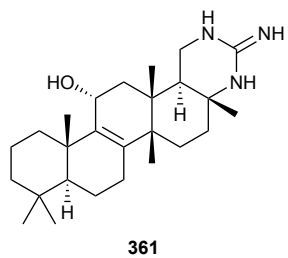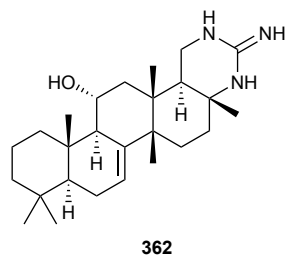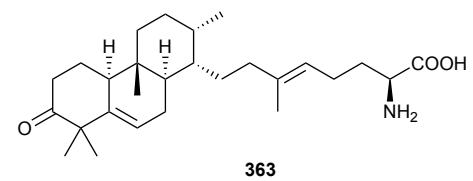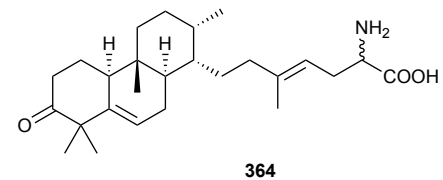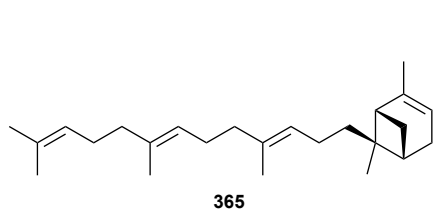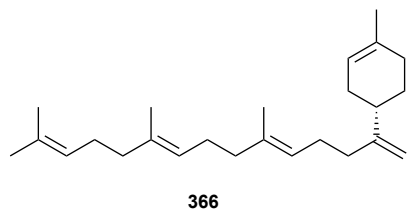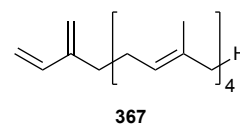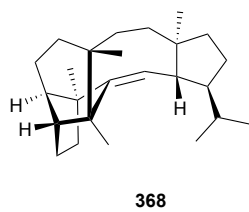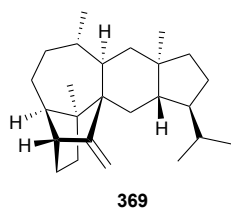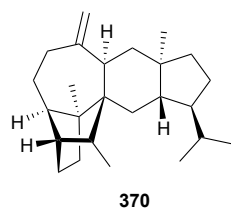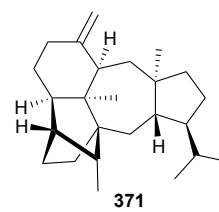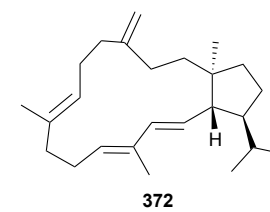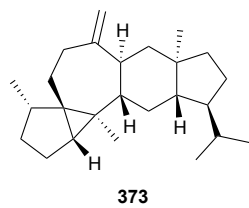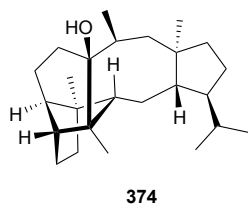

2.6.1 Triterpenoids: Sterols

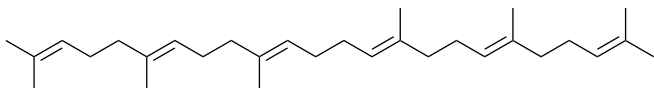

375

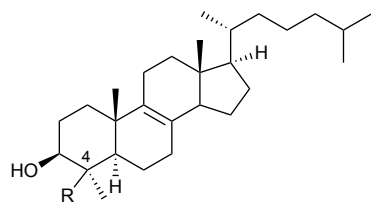

376 (R = H)  
378 (R = CH<sub>3</sub>)

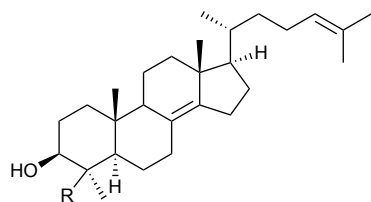

377 (R = H)  
379 (R = CH<sub>3</sub>)

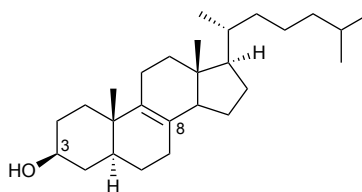

380

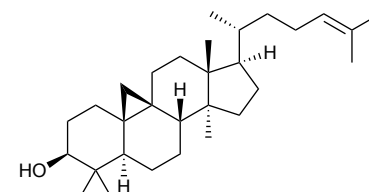

381

2.6.1 Triterpenoids: Hopanoids

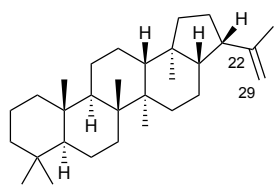

382

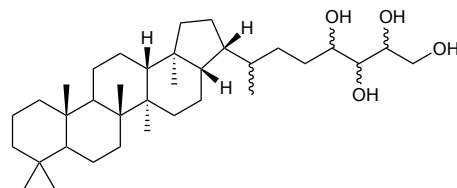

383

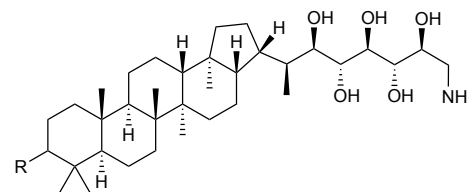

384 (R = H)  
385 (R = CH<sub>3</sub>)

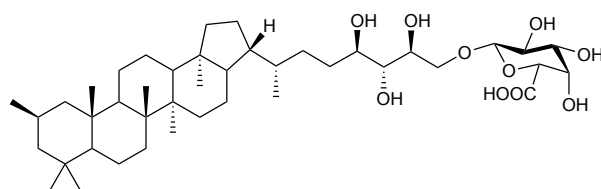

386

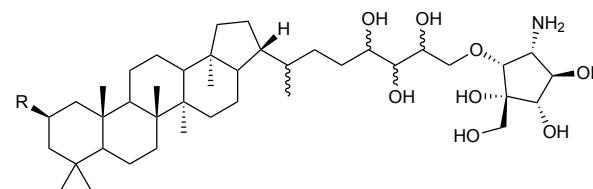

387 (R = H)  
388 (R = CH<sub>3</sub>)

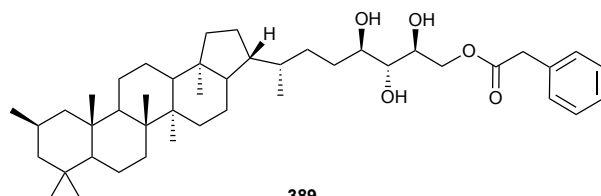

389

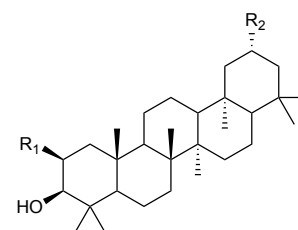

390 (R<sub>1</sub> = R<sub>2</sub> = H)  
391 (R<sub>1</sub> = H, R<sub>2</sub> = CH<sub>3</sub>)  
392 (R<sub>1</sub> = R<sub>2</sub> = CH<sub>3</sub>)  
393 (R<sub>1</sub> = CH<sub>3</sub>, R<sub>2</sub> = H)

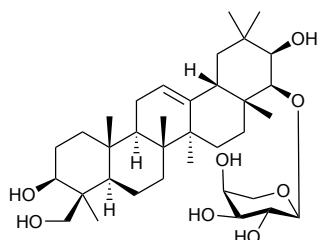

394

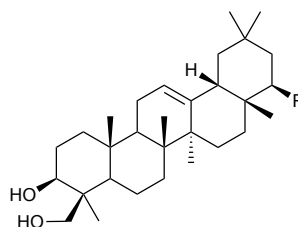

395 (R = H)  
396 (R = OH)

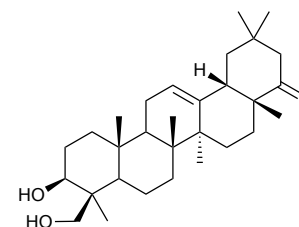

397

## 2.6.2 Triterpenoids: Miscellaneous triterpenoids

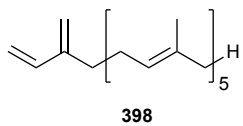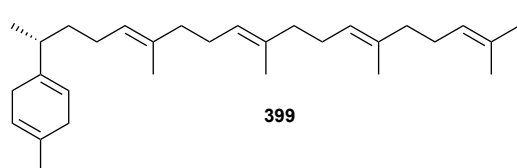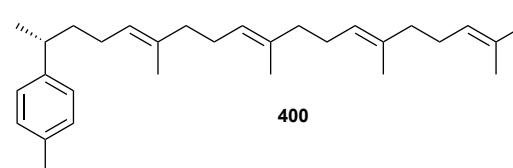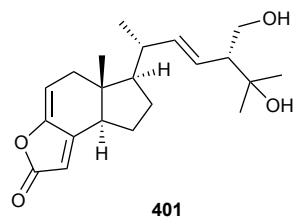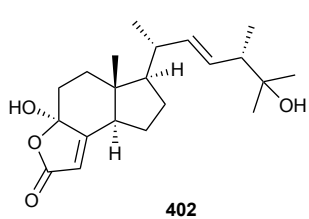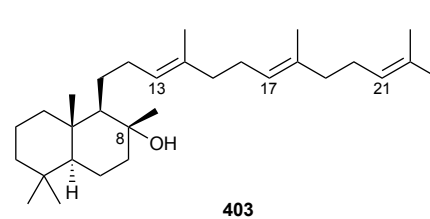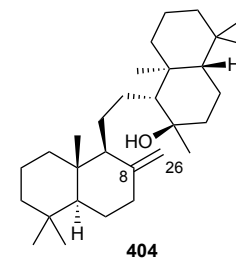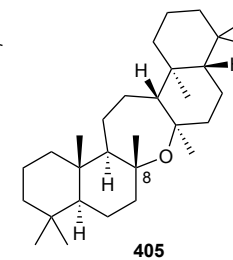

## 2.7 Sesquiterpenoids

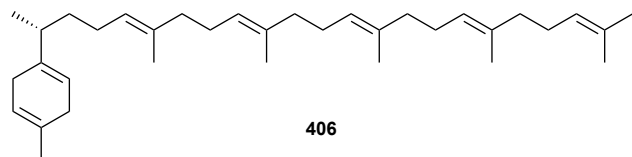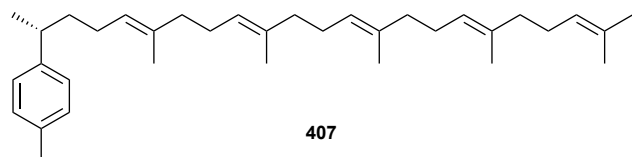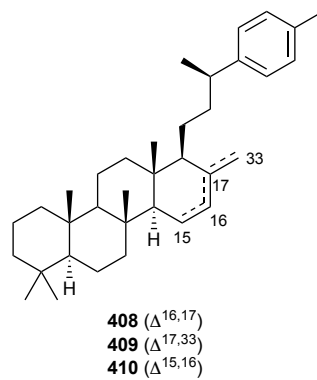

409 ( $\Delta^{17,33}$ )

410 ( $\Delta^{15,16}$ )

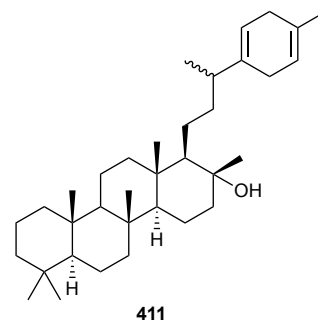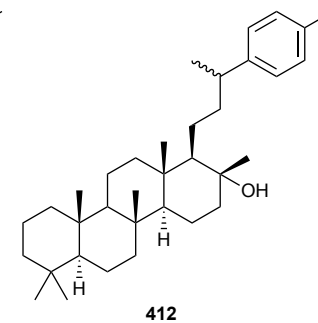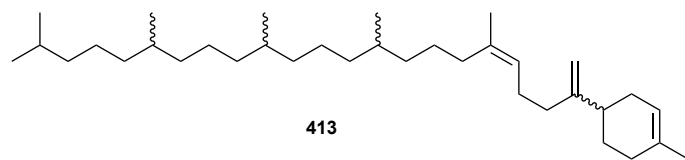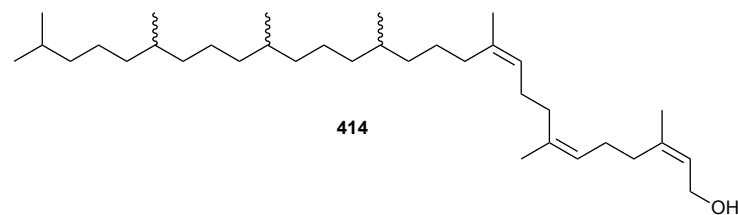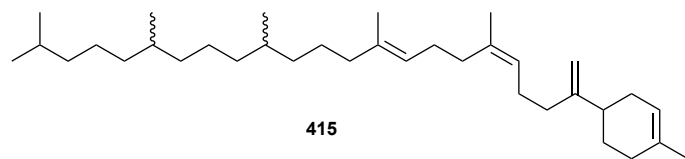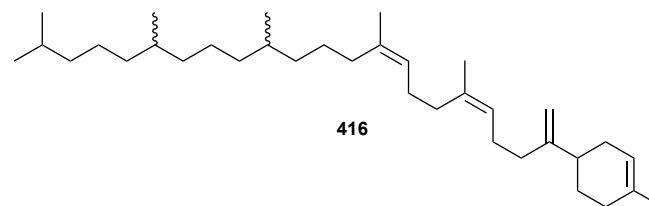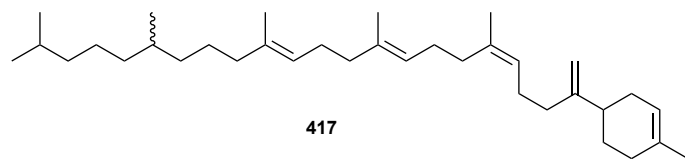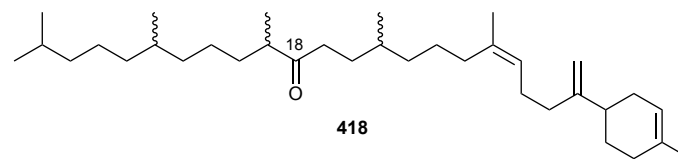

### 2.8.1 Tetraterpenoids: Carotenoids

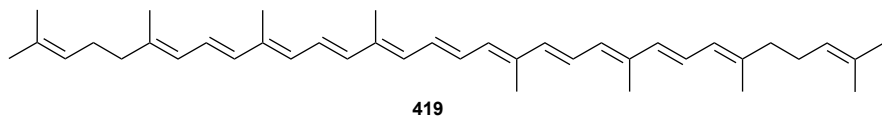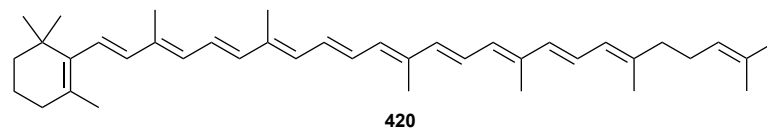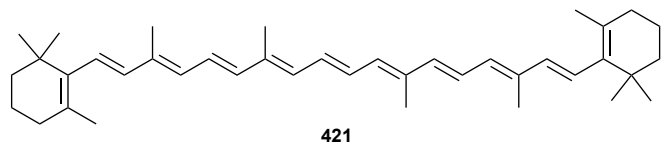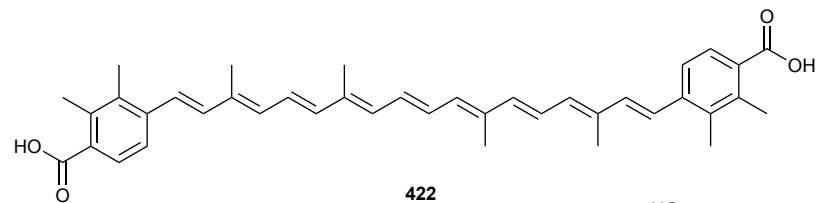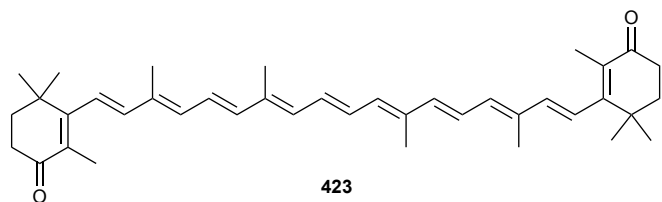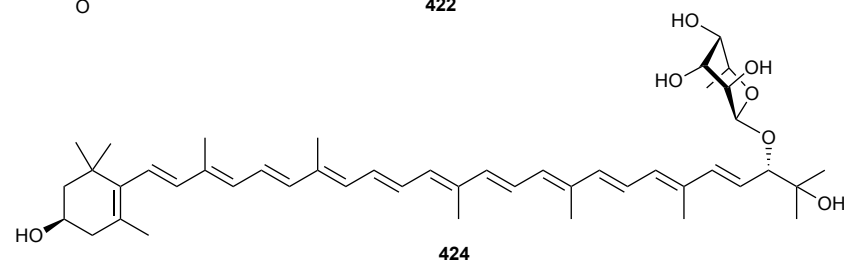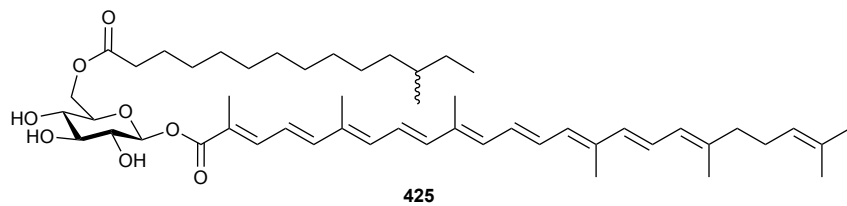

## 2.8.2 Tetraterpenoids: Other carotenoids

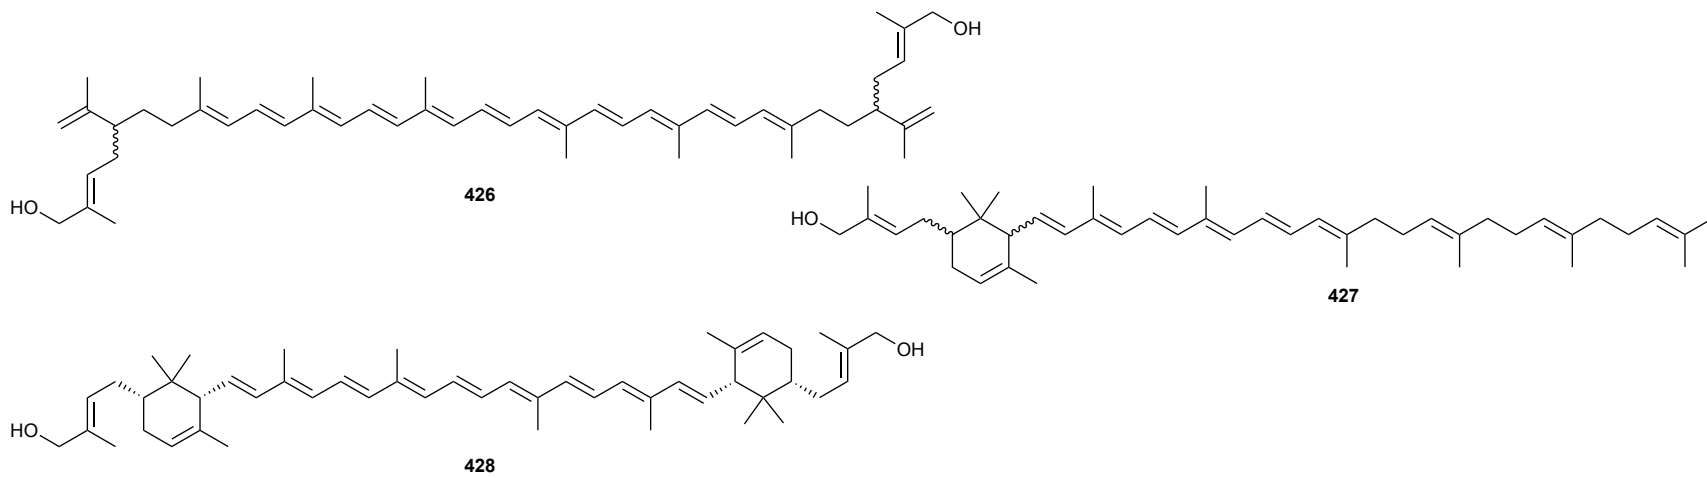

### 2.8.3 Tetraterpenoids: Norcarotenoids

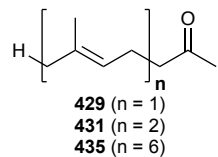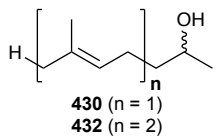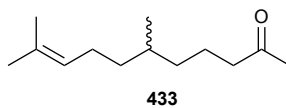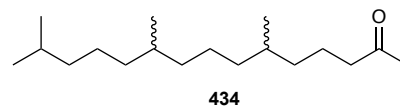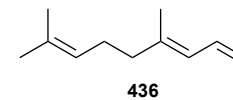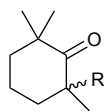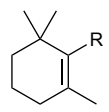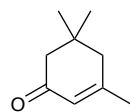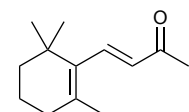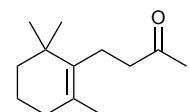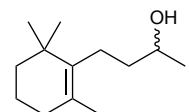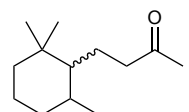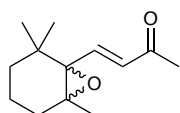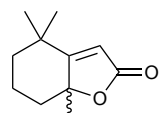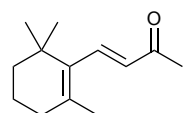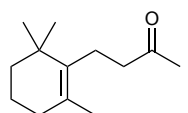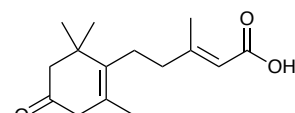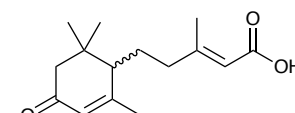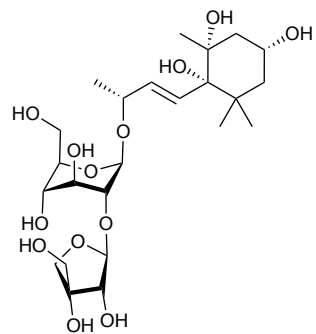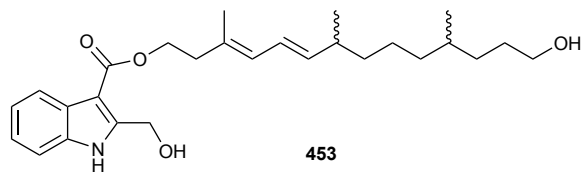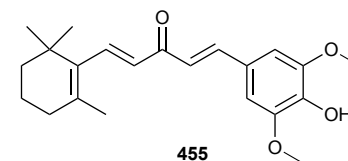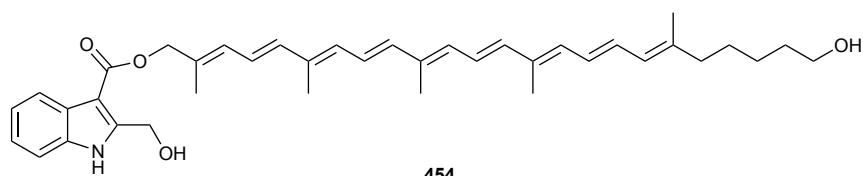



### 3.1 Aminocoumarins

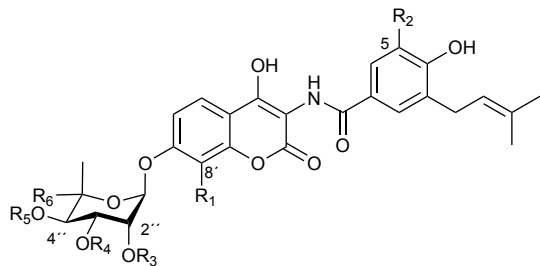

- 456** ( $R_1 = R_5 = R_6 = \text{CH}_3$ ,  $R_2 = R_3 = \text{H}$ ,  $R_4 = \text{CONH}_2$ )  
**458** ( $R_1 = R_6 = \text{CH}_3$ ,  $R_2 = R_3 = R_5 = \text{H}$ ,  $R_4 = \text{CONH}_2$ )  
**459** ( $R_1 = R_2 = R_3 = \text{H}$ ,  $R_5 = R_6 = \text{CH}_3$ ,  $R_4 = \text{CONH}_2$ )  
**460** ( $R_1 = R_5 = \text{CH}_3$ ,  $R_2 = R_3 = R_6 = \text{H}$ ,  $R_4 = \text{CONH}_2$ )  
**461** ( $R_1 = R_5 = R_6 = \text{CH}_3$ ,  $R_2 = R_3 = R_4 = \text{H}$ )  
**462** ( $R_1 = R_6 = \text{CH}_3$ ,  $R_2 = R_3 = R_4 = R_5 = \text{H}$ )  
**463** ( $R_1 = R_5 = R_6 = \text{CH}_3$ ,  $R_2 = \text{OH}$ ,  $R_3 = \text{H}$ ,  $R_4 = \text{CONH}_2$ )  
**464** ( $R_1 = R_6 = \text{CH}_3$ ,  $R_2 = \text{OH}$ ,  $R_3 = R_5 = \text{H}$ ,  $R_4 = \text{CONH}_2$ )  
**465** ( $R_1 = R_6 = \text{CH}_3$ ,  $R_2 = \text{OH}$ ,  $R_3 = R_4 = R_5 = \text{H}$ )  
**467** ( $R_1 = R_5 = R_6 = \text{CH}_3$ ,  $R_2 = R_4 = \text{H}$ ,  $R_3 = \text{CONH}_2$ )

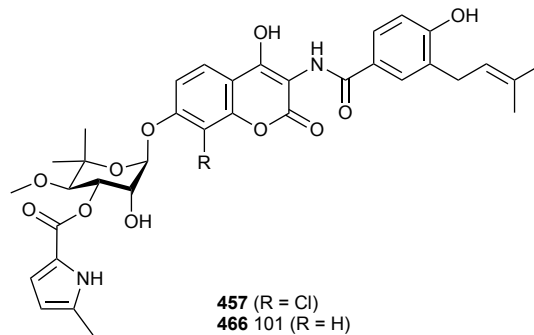

- 457** ( $R = \text{Cl}$ )  
**466 101** ( $R = \text{H}$ )

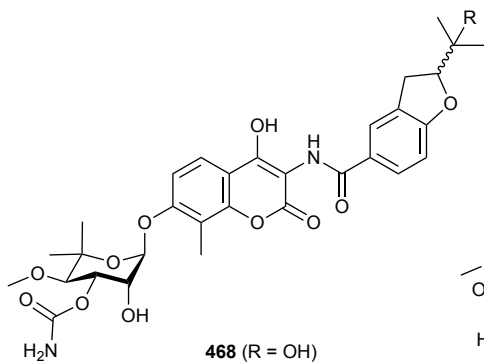

- 468** ( $R = \text{OH}$ )  
**469** ( $R = \text{H}$ )

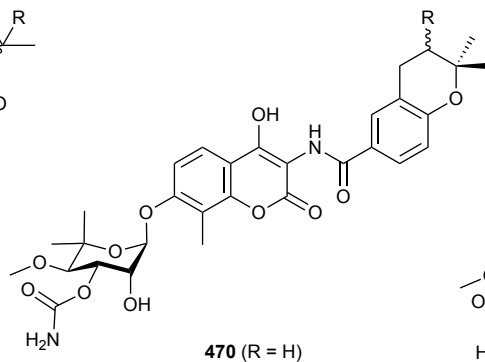

- 470** ( $R = \text{H}$ )  
**471** ( $R = \text{OH}$ )

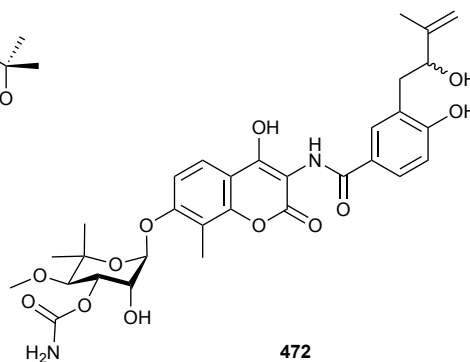

- 472**

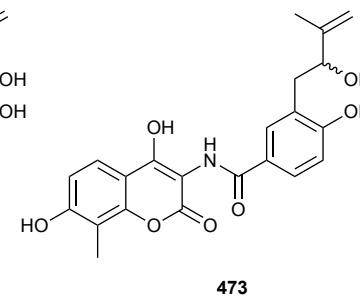

- 473**

### 3.2 Benzastatins

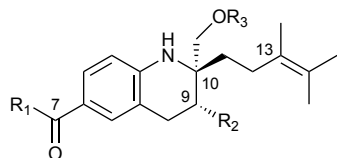

- 474** ( $R_1 = \text{OH}, R_2 = \text{Cl}, R_3 = \text{CH}_3$ )  
**477** ( $R_1 = \text{NH}_2, R_2 = \text{Cl}, R_3 = \text{CH}_3$ )  
**478** ( $R_1 = \text{NH}_2, R_2 = \text{OH}, R_3 = \text{CH}_3$ )  
**486** ( $R_1 = R_2 = \text{OH}, R_3 = \text{CH}_3$ )  
**488** ( $R_1 = \text{OH}, R_2 = \text{erg}, R_3 = \text{CH}_3$ )  
**489** ( $R_1 = \text{NH-HCP}, R_2 = \text{OH}, R_3 = \text{CH}_3$ )  
**494** ( $R_1 = \text{OH}, R_2 = \text{Cl}, R_3 = \text{H}$ )  
**495** ( $R_1 = R_2 = \text{OH}, R_3 = \text{H}$ )

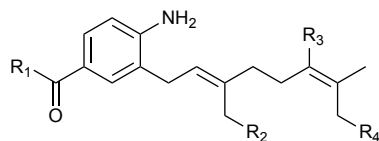

- 475** ( $R_1 = \text{NH}_2, R_2 = \text{OCH}_3, R_3 = \text{CH}_3, R_4 = \text{H}$ )  
**476** ( $R_1 = \text{NH}_2, R_2 = R_4 = \text{H}, R_3 = \text{CH}_3$ )  
**482** ( $R_1 = \text{NH}_2, R_2 = R_4 = \text{H}, R_3 = \text{CH}_2\text{OH}$ )  
**483** ( $R_1 = \text{NH}_2, R_2 = \text{H}, R_3 = \text{CH}_3, R_4 = \text{OH}$ )  
**496** ( $R_1 = \text{OH}, R_2 = R_3 = R_4 = \text{H}$ )  
**497** ( $R_1 = \text{OH}, R_2 = R_4 = \text{H}, R_3 = \text{CH}_3$ )  
**498** ( $R_1 = R_2 = \text{OH}, R_3 = \text{CH}_3, R_4 = \text{H}$ )

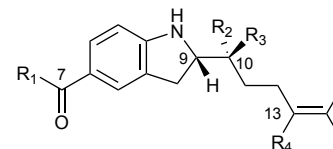

- 479** ( $R_1 = \text{NH}_2, R_2 = \text{OH}, R_3 = \text{CH}_2\text{OCH}_3, R_4 = \text{CH}_3$ )  
**480** ( $R_1 = \text{NH}_2, R_2 = \text{OH}, R_3 = R_4 = \text{CH}_3$ )  
**481** ( $R_1 = \text{NH}_2, R_2 = \text{OH}, R_3 = \text{CH}_3, R_4 = \text{H}$ )  
**484** ( $R_1 = \text{OH}, R_2 = \text{OH}, R_3 = \text{CH}_3, R_4 = \text{H}$ )  
**485** ( $R_1 = R_2 = \text{OH}, R_3 = \text{CH}_2\text{OCH}_3, R_4 = \text{CH}_3$ )  
**487** ( $R_1 = \text{OH}, R_2 = \text{Cl}, R_3 = \text{CH}_2\text{OCH}_3, R_4 = \text{CH}_3$ )  
**490** ( $R_1 = \text{NH-HCP}, R_2 = \text{OH}, R_3 = \text{CH}_2\text{OCH}_3, R_4 = \text{CH}_3$ )  
**499** ( $R_1 = R_2 = \text{OH}, R_3 = R_4 = \text{CH}_3$ )

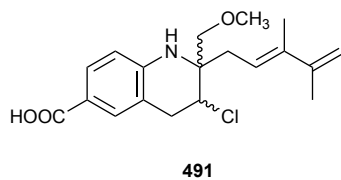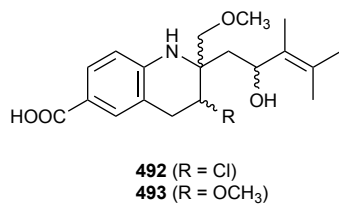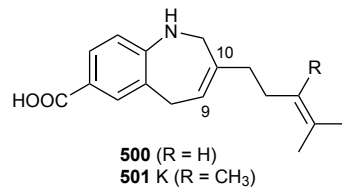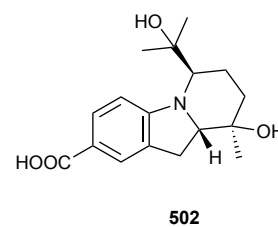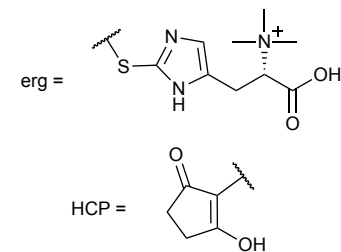

### 3.3.1 Indoles: Simple Indoles

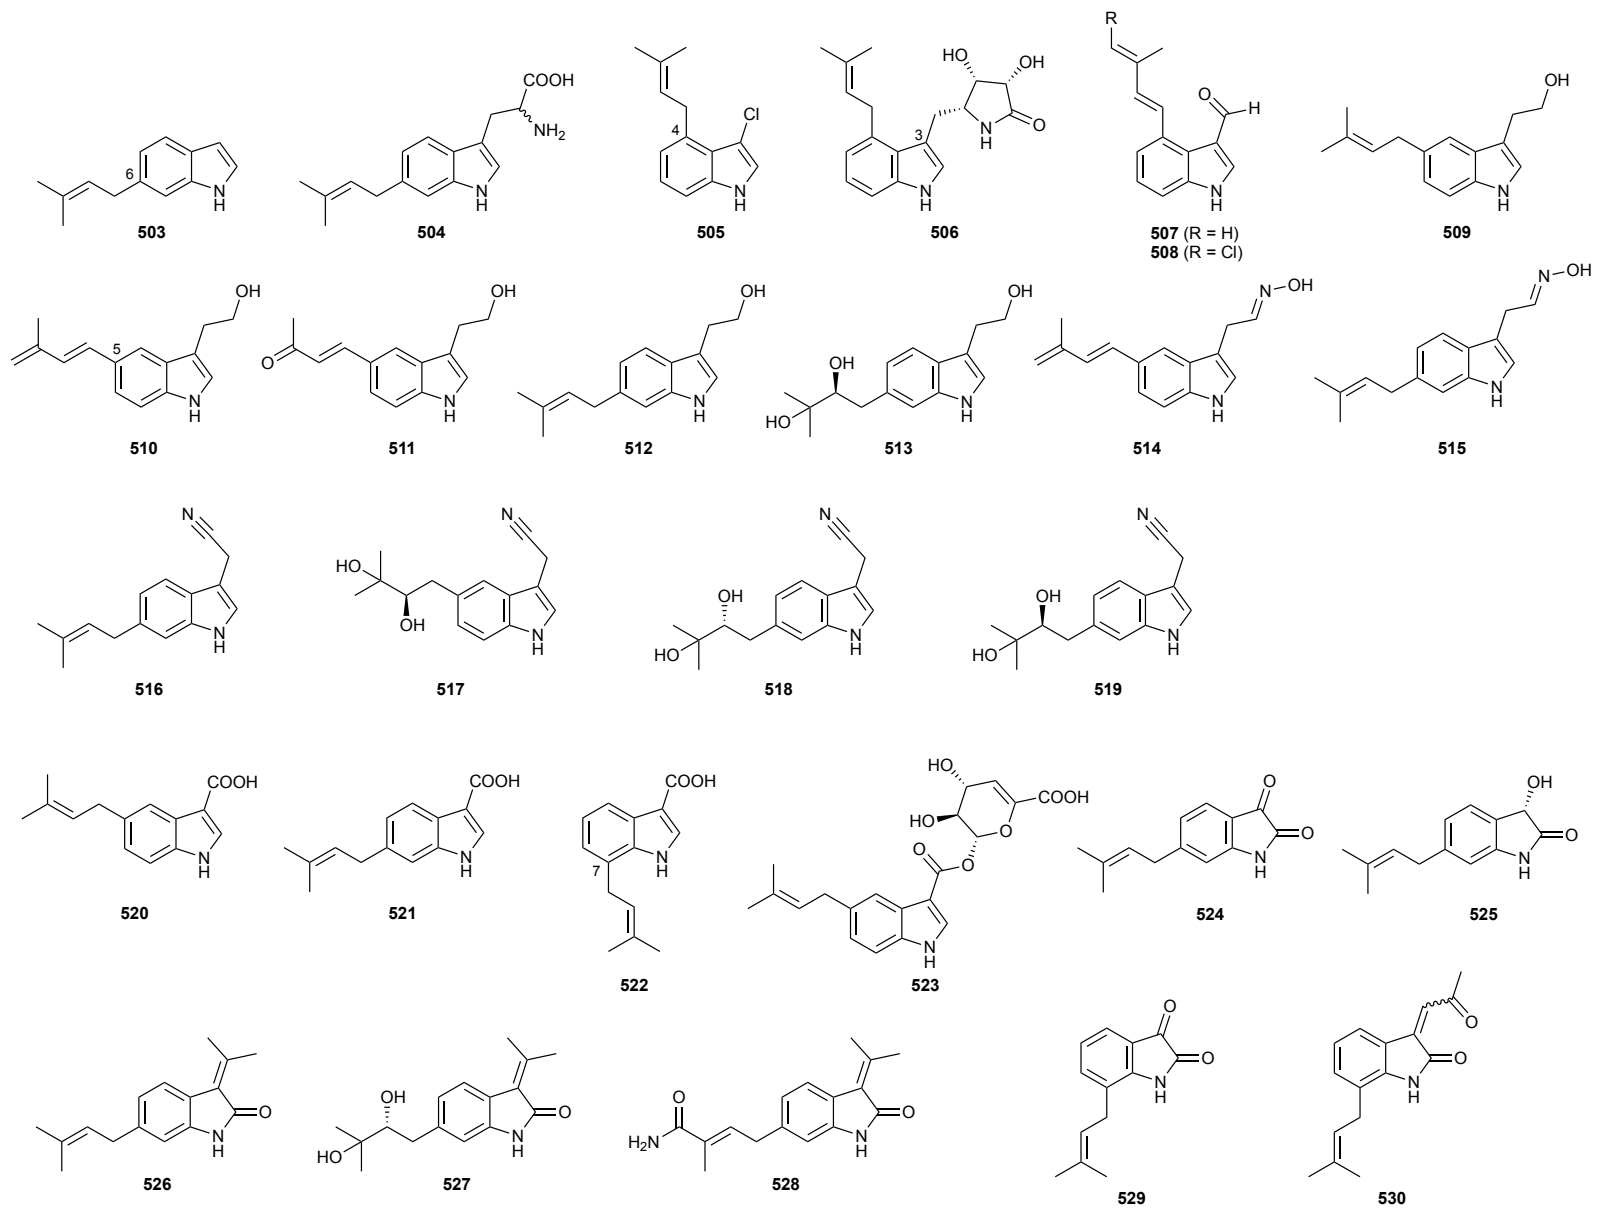

### 3.3.2.1 Indoles: Hapalindole-like indole alkaloids group 1

#### Group 1

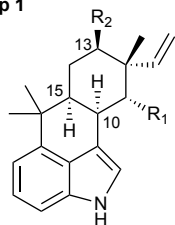

- 531 ( $R_1 = \text{NC}$ ,  $R_2 = \text{Cl}$ )  
 532 ( $R_1 = \text{NCS}$ ,  $R_2 = \text{Cl}$ )  
 533 ( $R_1 = \text{NC}$ ,  $R_2 = \text{H}$ )  
 534 ( $R_1 = \text{NCS}$ ,  $R_2 = \text{H}$ )  
 535 ( $R_1 = \text{NCS}$ ,  $R_2 = \text{OH}$ )  
 536 ( $R_1 = \text{NHCHO}$ ,  $R_2 = \text{Cl}$ )  
 537 ( $R_1 = \text{NHCHO}$ ,  $R_2 = \text{H}$ )

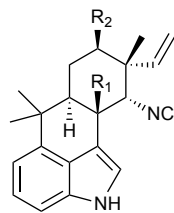

- 538 ( $R_1 = \text{H}$ ,  $R_2 = \text{Cl}$ )  
 539 ( $R_1 = R_2 = \text{H}$ )  
 540 ( $R_1 = \text{OH}$ ,  $R_2 = \text{Cl}$ )

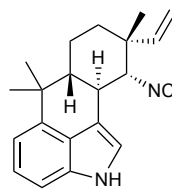

541

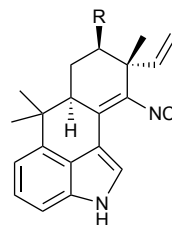

- 542 ( $R = \text{Cl}$ )  
 543 ( $R = \text{H}$ )

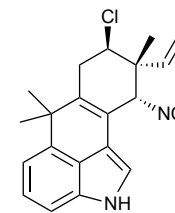

544

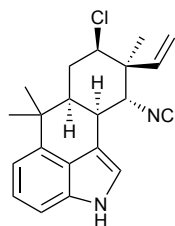

- 545 ( $R = \text{Cl}$ )  
 546 ( $R = \text{H}$ )

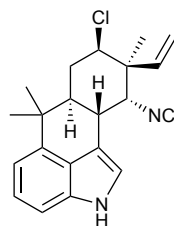

547

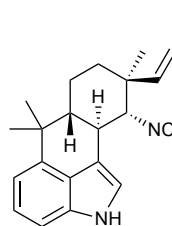

548

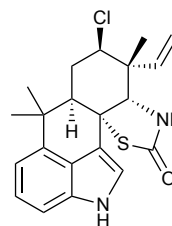

549

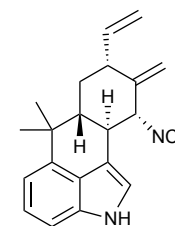

550

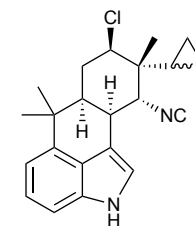

- 551/552  
 (epimers not determined)

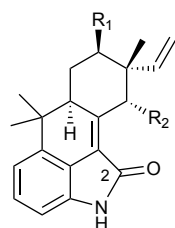

- 553 ( $R_1 = \text{Cl}$ ,  $R_2 = \text{NC}$ )  
 554 ( $R_1 = \text{Cl}$ ,  $R_2 = \text{NCS}$ )  
 555 ( $R_1 = \text{H}$ ,  $R_2 = \text{NCS}$ )

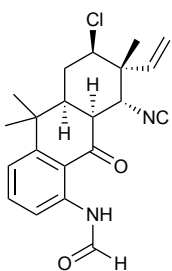

556

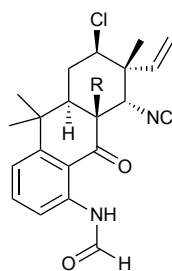

- 557 ( $R = \text{H}$ )  
 558 ( $R = \text{OH}$ )

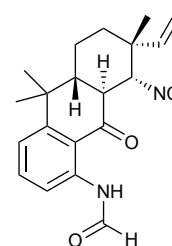

559

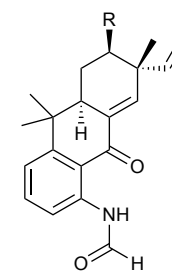

- 560 ( $R = \text{Cl}$ )  
 561 ( $R = \text{H}$ )  
 562 ( $R = \text{OH}$ )

### 3.3.2.2 Indoles: Hapalindole-like indole alkaloids groups 2–5

Group 2

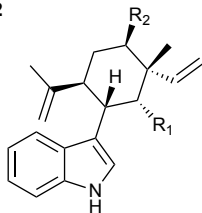

**563** (R<sub>1</sub> = NC, R<sub>2</sub> = H)  
**564** (R<sub>1</sub> = NCS, R<sub>2</sub> = H)  
**565** (R<sub>1</sub> = NC, R<sub>2</sub> = Cl)  
**566** (R<sub>1</sub> = NCS, R<sub>2</sub> = Cl)

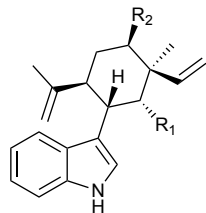

**567** (R<sub>1</sub> = NC, R<sub>2</sub> = H)  
**568** (R<sub>1</sub> = NCS, R<sub>2</sub> = H)  
**569** (R<sub>1</sub> = NC, R<sub>2</sub> = Cl)  
**570** (R<sub>1</sub> = NCS, R<sub>2</sub> = Cl)

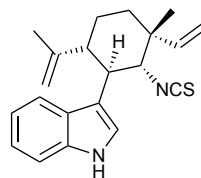

**571**

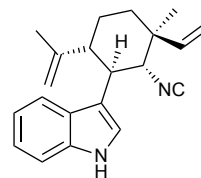

**572**

Group 3

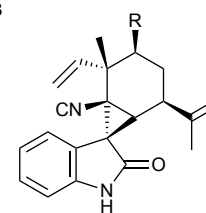

**573** (R = Cl)  
**574** (R = H)

Group 4

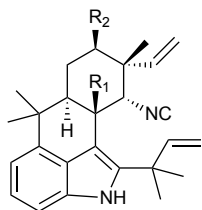

**575** (R<sub>1</sub> = H, R<sub>2</sub> = Cl)  
**576** (R<sub>1</sub> = OH, R<sub>2</sub> = Cl)  
**577** (R<sub>1</sub> = OH, R<sub>2</sub> = H)  
**578** (R<sub>1</sub> = H, R<sub>2</sub> = H)

Group 5

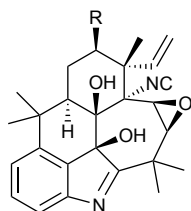

**579** (R = Cl)  
**580** (R = H)

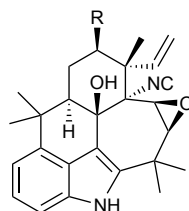

**581** (R = Cl)  
**582** (R = H)

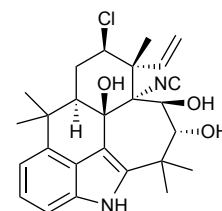

**583**

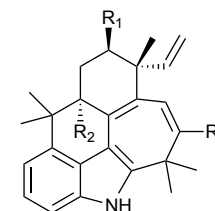

**584** (R<sub>1</sub> = Cl, R<sub>2</sub> = H, R<sub>3</sub> = CN)  
**585** (R<sub>1</sub> = R<sub>3</sub> = H, R<sub>2</sub> = OH)  
**586** (R<sub>1</sub> = R<sub>2</sub> = H, R<sub>3</sub> = CN)

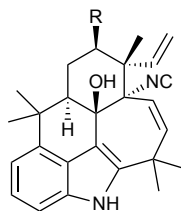

**587** (R = Cl)  
**588** (R = H)

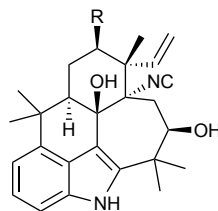

**589** (R = Cl)  
**590** (R = H)

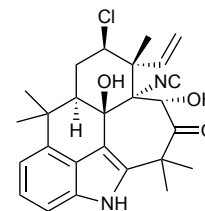

**591**

3.3.2.3 Indoles: Hapalindole-like indole alkaloids groups 6–9

Group 6

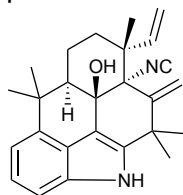

592

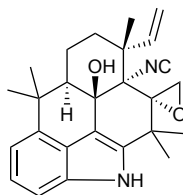

593

Group 8

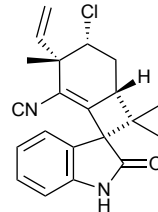

603

Group 7

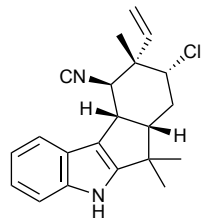

594

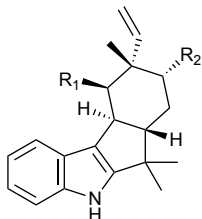

595 (R<sub>1</sub> = NC, R<sub>2</sub> = Cl)  
596 (R<sub>1</sub> = NC, R<sub>2</sub> = H)  
597 (R<sub>1</sub> = NCS, R<sub>2</sub> = H)

Group 9

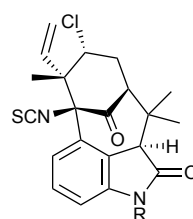

604 (R = H)  
605 (R = CH<sub>3</sub>)

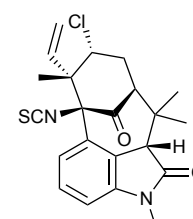

606

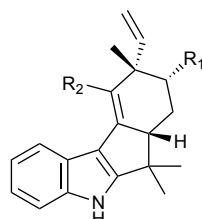

598 (R<sub>1</sub> = Cl, R<sub>2</sub> = NC)  
599 (R<sub>1</sub> = Cl, R<sub>2</sub> = CN)  
600 (R<sub>1</sub> = H, R<sub>2</sub> = CN)

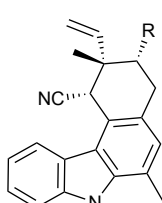

601 (R = Cl)  
602 (R = H)

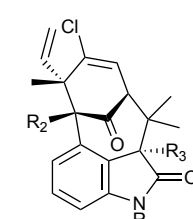

607 (R<sub>1</sub> = CH<sub>3</sub>, R<sub>2</sub> = NC, R<sub>3</sub> = H)  
608 (R<sub>1</sub> = H, R<sub>2</sub> = NCS, R<sub>3</sub> = H)  
609 (R<sub>1</sub> = CH<sub>3</sub>, R<sub>2</sub> = NCS, R<sub>3</sub> = H)  
610 (R<sub>1</sub> = CH<sub>3</sub>, R<sub>2</sub> = NC, R<sub>3</sub> = OH)  
611 (R<sub>1</sub> = CH<sub>3</sub>, R<sub>2</sub> = NCS, R<sub>3</sub> = OH)

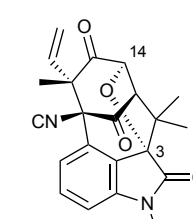

612

### 3.3.3.1 Indoles: Xiamycin monomers

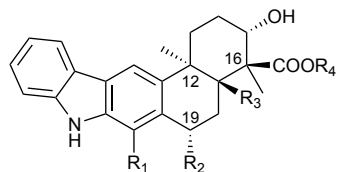

- 613** ( $R_1 = R_2 = R_3 = R_4 = H$ )  
**614** ( $R_1 = R_2 = R_3 = H, R_4 = CH_3$ )  
**617** ( $R_1 = R_2 = R_4 = H, R_3 = OH$ )  
**618** ( $R_1 = R_3 = R_4 = H, R_2 = OH$ )  
**619** ( $R_1 = R_3 = H, R_2 = OH, R_4 = CH_3$ )  
**621** ( $R_1 = Cl, R_2 = R_3 = R_4 = H$ )

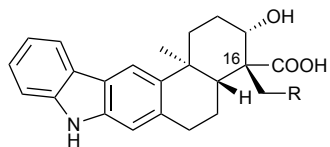

- 615** ( $R = H$ )  
**616** ( $R = OH$ )

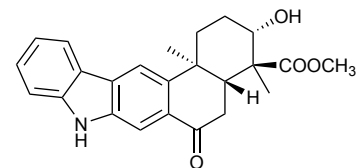

**620**

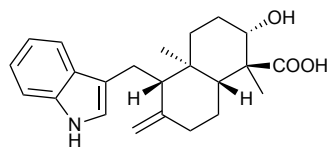

**622**

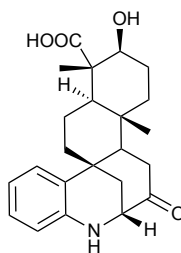

**623**

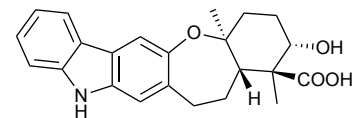

**624**

### 3.3.3.2 Indoles: Xiamycin dimers

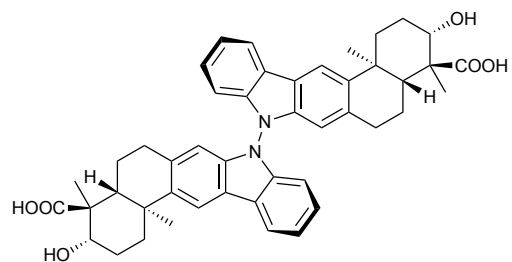

625

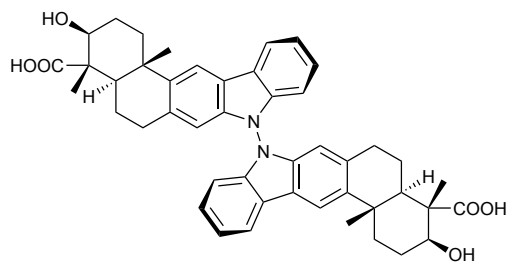

626

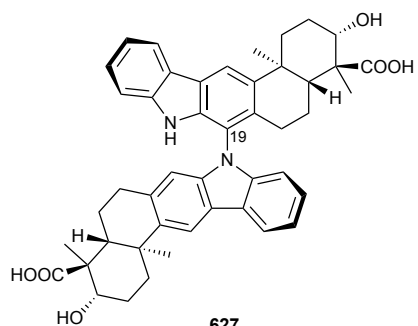

627

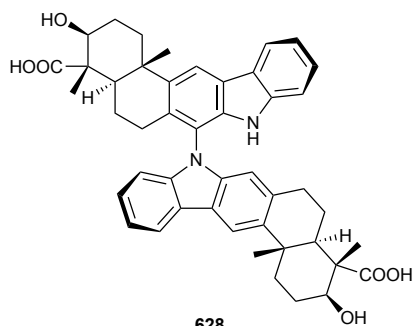

628

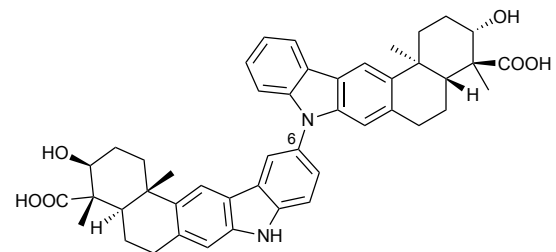

629

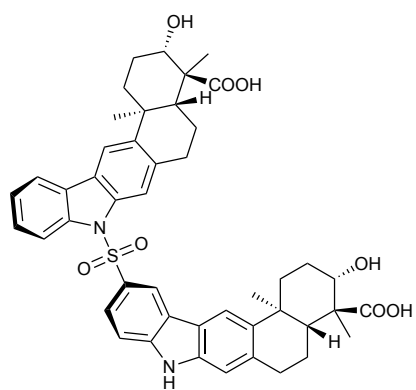

630

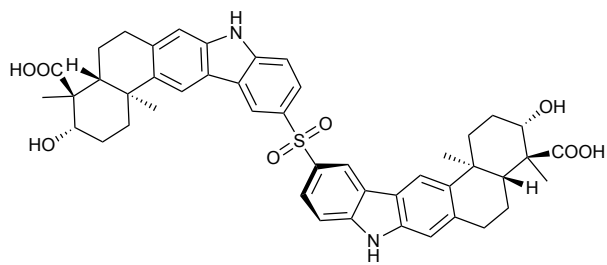

631

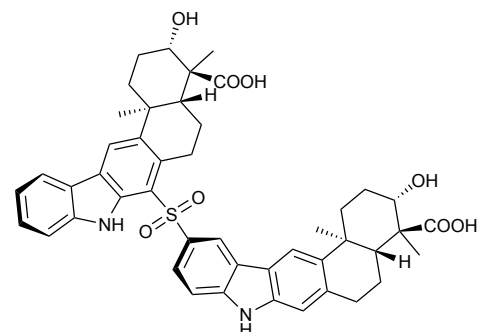

632



### 3.3.4 Indoles: Miscellaneous polycyclic indoles

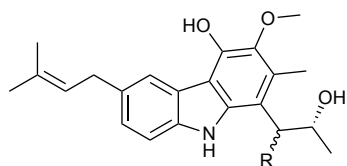

633 (R = OH)  
634 (R = H)  
635 (R = OCH<sub>3</sub>)

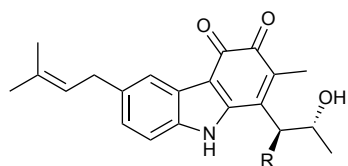

636 (R = H)  
637 (R = OH)

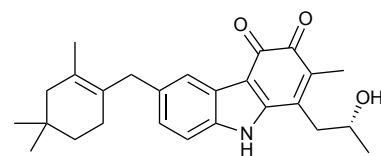

638

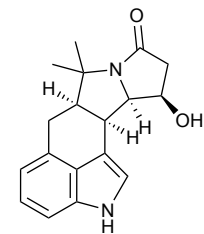

639

### 3.4 Nucleobases and nucleosides

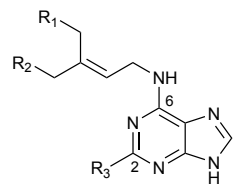

- 640 ( $R_1 = R_2 = R_3 = H$ )  
 641 ( $R_1 = OH, R_2 = R_3 = H$ )  
 642 ( $R_1 = R_3 = H, R_2 = OH$ )  
 645 ( $R_1 = OH, R_2 = H, R_3 = SCH_3$ )

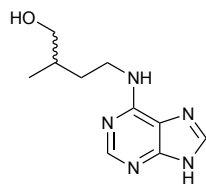

643

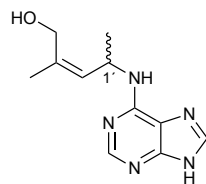

644

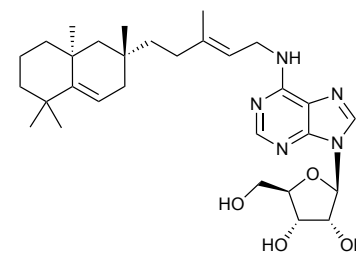

645

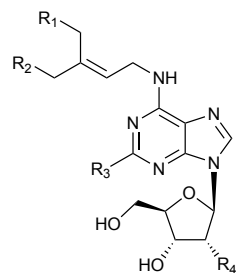

- 646 ( $R_1 = R_2 = R_3 = H, R_4 = OH$ )  
 647 ( $R_1 = OH, R_2 = R_3 = H$ )  
 648 ( $R_1 = R_3 = H, R_2 = R_4 = OH$ )  
 649 ( $R_1 = R_3 = R_4 = H, R_2 = OH$ )  
 650 ( $R_1 = R_2 = H, R_3 = SCH_3$ )  
 651 ( $R_1 = OH, R_2 = H, R_3 = SCH_3$ )

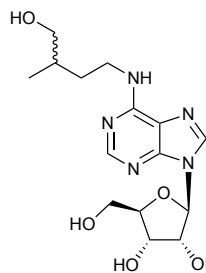

647

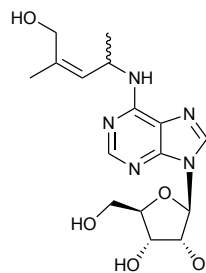

648

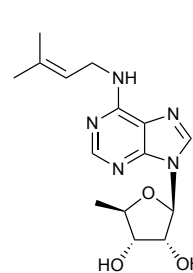

649

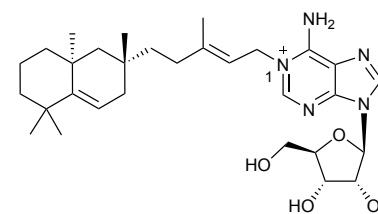

650

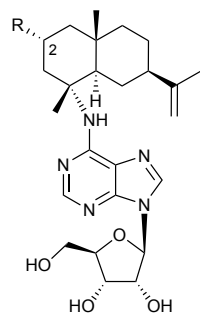

- 655 ( $R = H$ )  
 656 ( $R = OH$ )

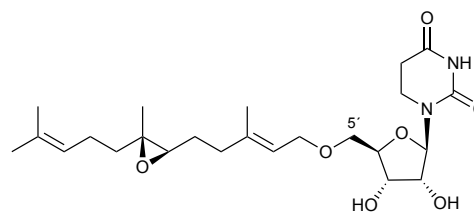

659

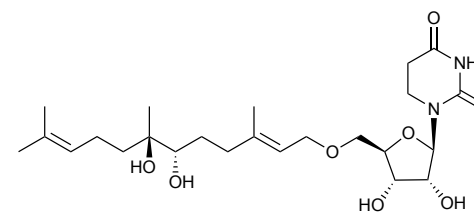

660

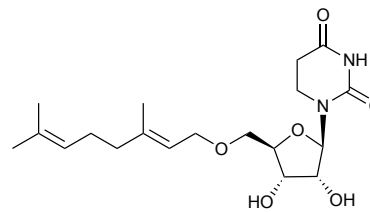

661

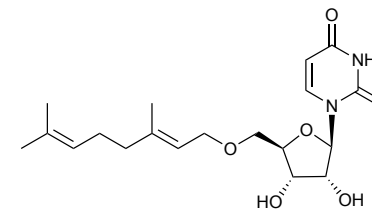

662

### 3.5.1.1 Peptides: Ribosomal peptides: ComX

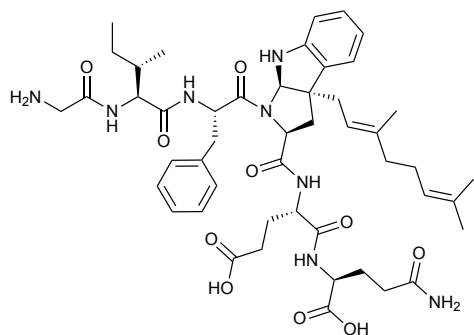

663

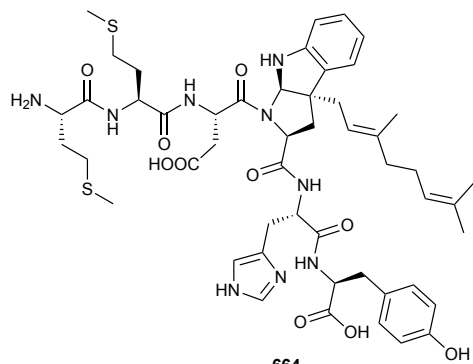

664

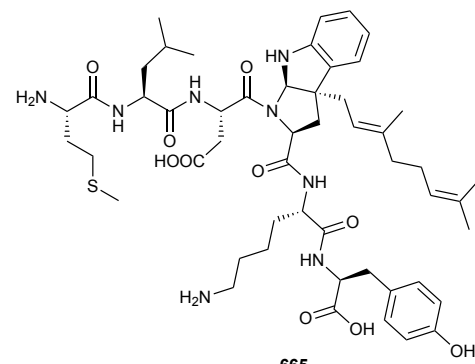

665

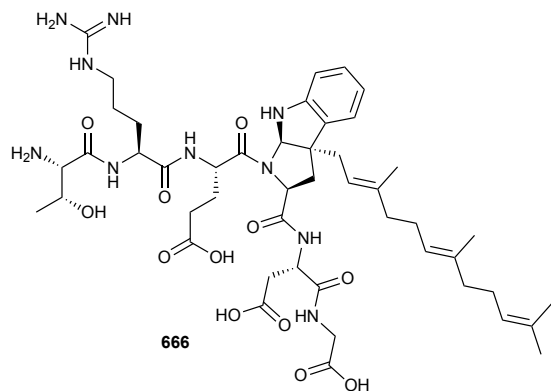

666

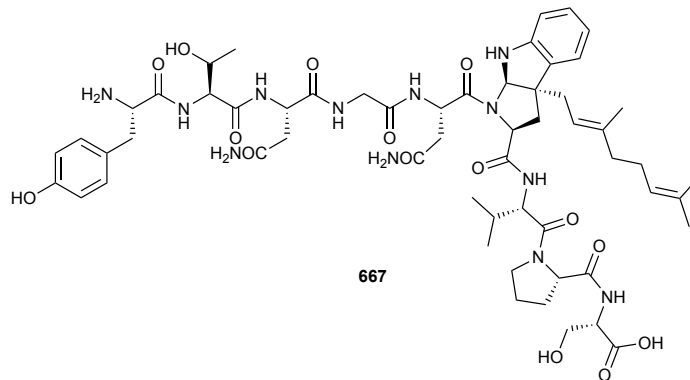

667

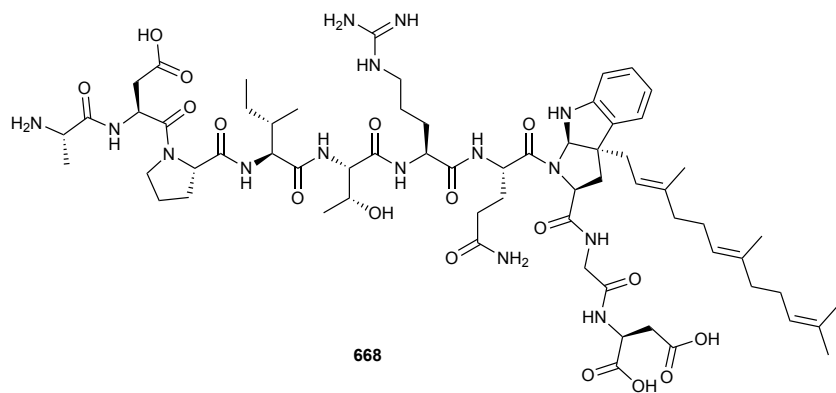

668

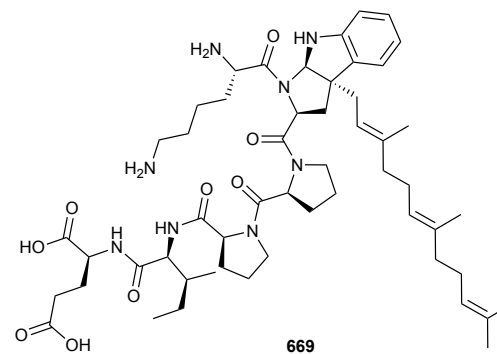

669

### 3.5.1.1 Peptides: Ribosomal peptides: Linear cyanobactins

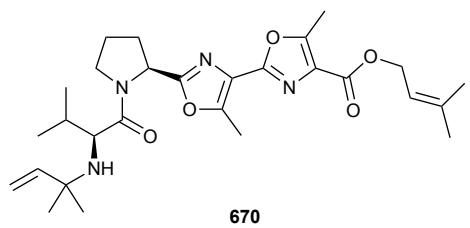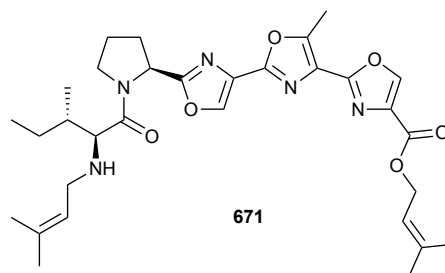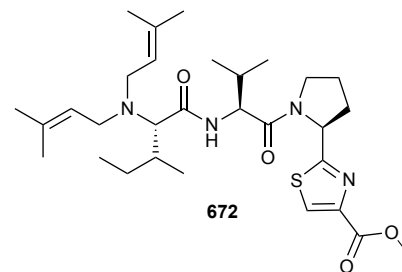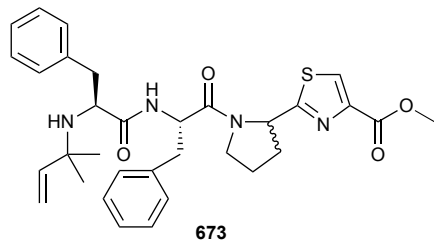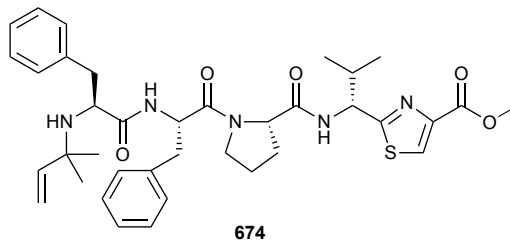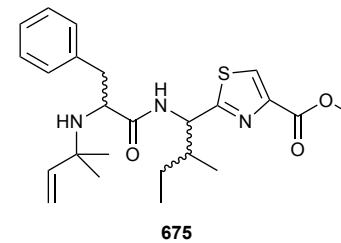

3.5.1.1 Peptides: Ribosomal peptides: Cyclic cyanobactins

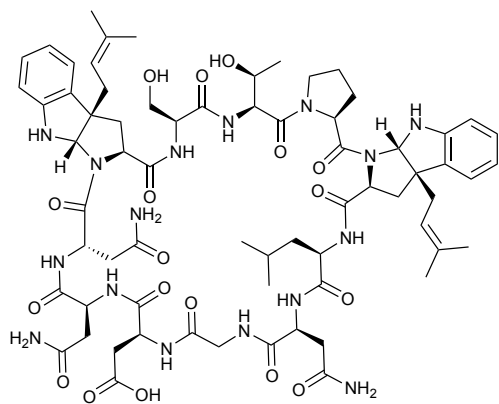

676

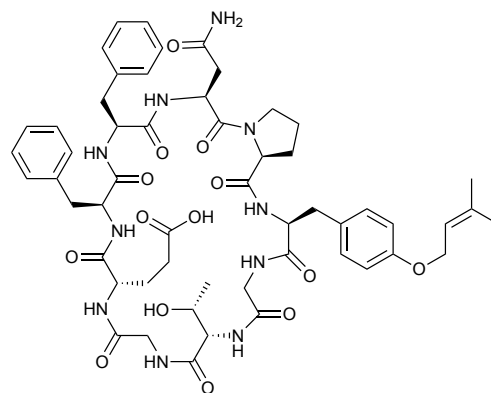

677

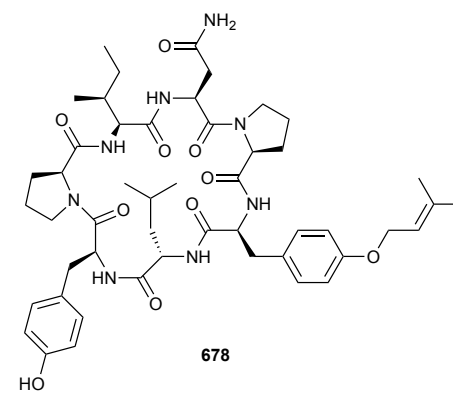

678

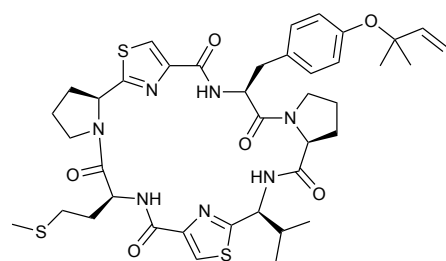

679

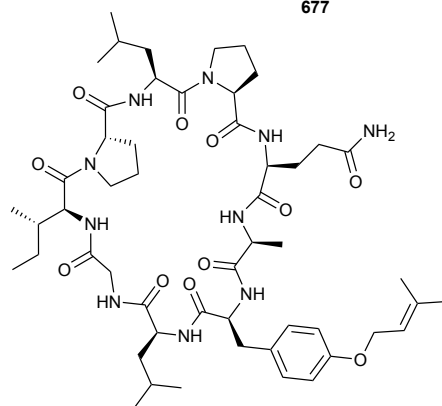

680

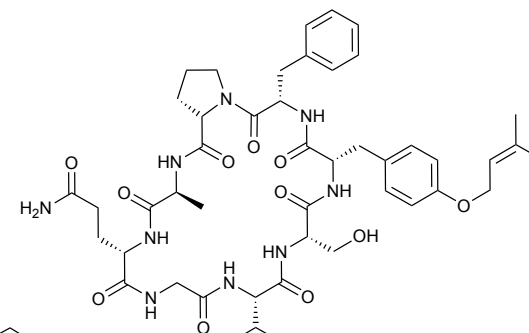

681

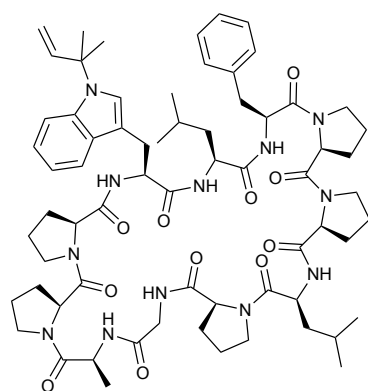

682

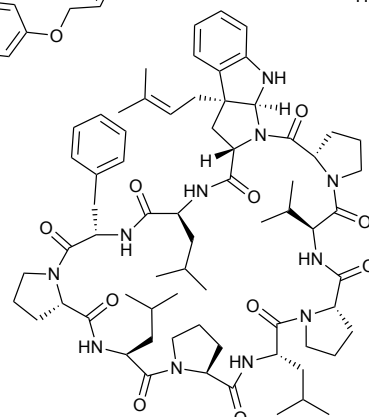

683

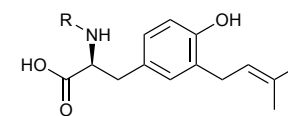

684 (R = H)  
685 (R = COCH<sub>3</sub>)

### 3.5.2 Nonribosomal peptides

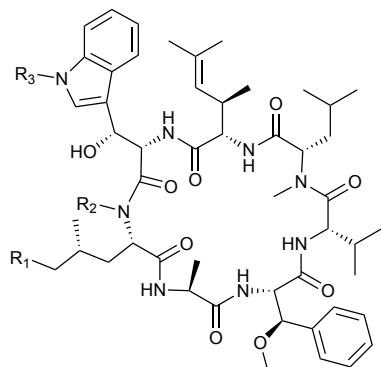

- 686** ( $R_1 = \text{OH}$ ,  $R_2 = \text{CH}_3$ ,  $R_3 = \text{epoxy-r-prenyl}$ )  
**687** ( $R_1 = \text{H}$ ,  $R_2 = \text{CH}_3$ ,  $R_3 = \text{epoxy-r-prenyl}$ )  
**688** ( $R_1 = \text{OH}$ ,  $R_2 = \text{CH}_3$ ,  $R_3 = \text{r-prenyl}$ )  
**689** ( $R_1 = \text{OH}$ ,  $R_2 = \text{H}$ ,  $R_3 = \text{r-prenyl}$ )

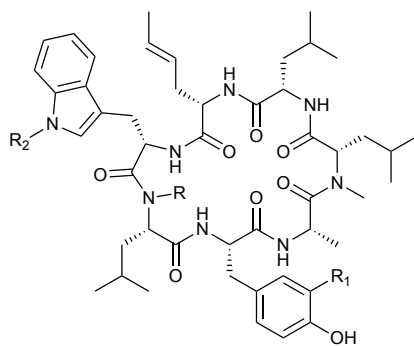

- 690** ( $R_1 = \text{NO}_2$ ,  $R_2 = \text{CH}_3$ ,  $R_3 = \text{r-prenyl}$ )  
**691** ( $R_1 = \text{NO}_2$ ,  $R_2 = \text{CH}_3$ ,  $R_3 = \text{epoxy-r-prenyl}$ )  
**699** ( $R_1 = \text{H}$ ,  $R_2 = \text{CH}_3$ ,  $R_3 = \text{r-prenyl}$ )  
**701** ( $R_1 = \text{NO}_2$ ,  $R_2 = \text{H}$ ,  $R_3 = \text{epoxy-r-prenyl}$ )

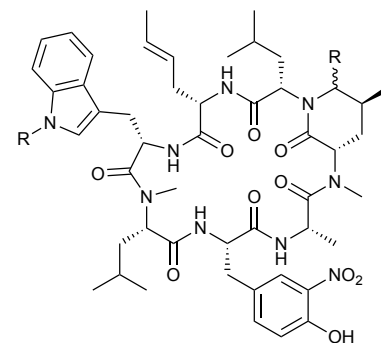

- 692** ( $R_1 = \alpha\text{-OH}$ ,  $R_2 = \text{epoxy-r-prenyl}$ )  
**693** ( $R_1 = \beta\text{-OH}$ ,  $R_2 = \text{epoxy-r-prenyl}$ )  
**695** ( $R_1 = \alpha\text{-OH}$ ,  $R_2 = \text{r-prenyl}$ )

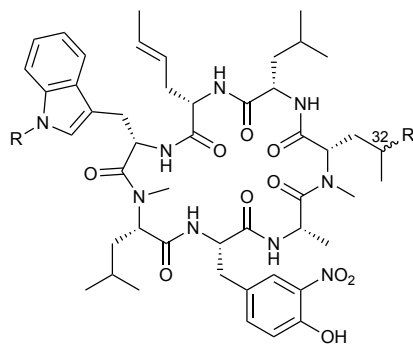

- 694** (32S,  $R_1 = \text{COOH}$ ,  $R_2 = \text{epoxy-r-prenyl}$ )  
**696** (32S,  $R_1 = \text{CH}_2\text{OH}$ ,  $R_2 = \text{epoxy-r-prenyl}$ )  
**697** (32R,  $R_1 = \text{CH}_2\text{OH}$ ,  $R_2 = \text{epoxy-r-prenyl}$ )  
**698** (32S,  $R_1 = \text{CH}_2\text{OH}$ ,  $R_2 = \text{r-prenyl}$ )  
**700** ( $R_1 = \text{CH}(\text{OCH}_3)_2$ ,  $R_2 = \text{epoxy-r-prenyl}$ )

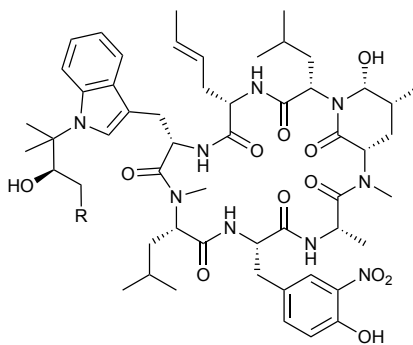

- 702** ( $R = \text{OH}$ )  
**704** ( $R = \text{Cl}$ )

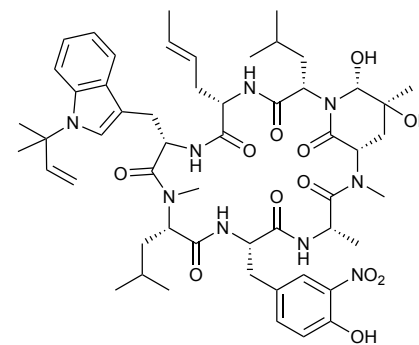

- 703**

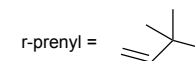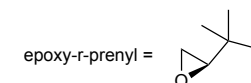

### 3.5.2 Nonribosomal peptides

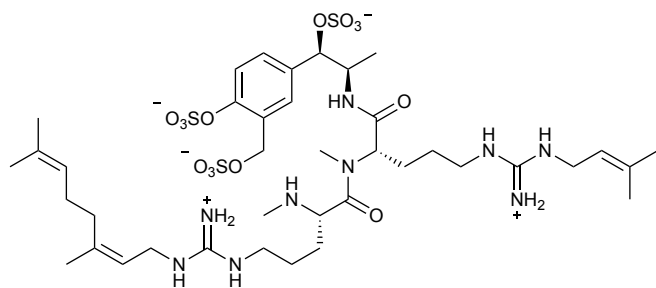

705

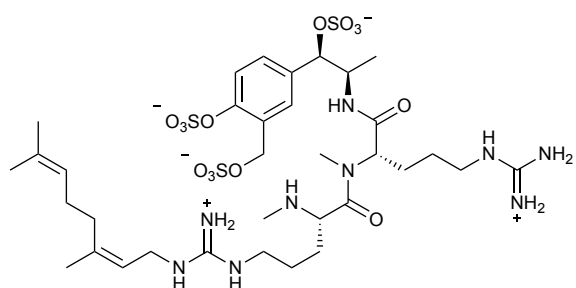

706

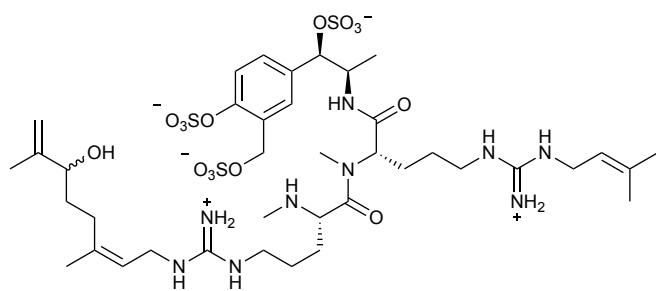

707

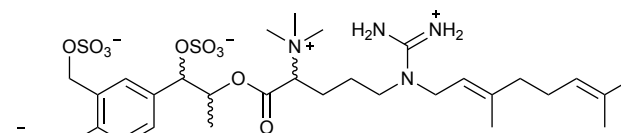

708

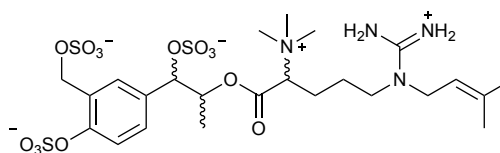

709

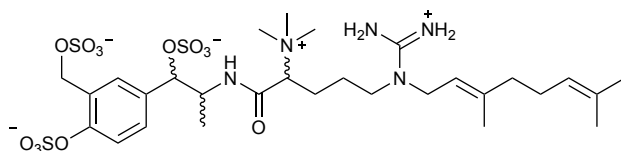

710

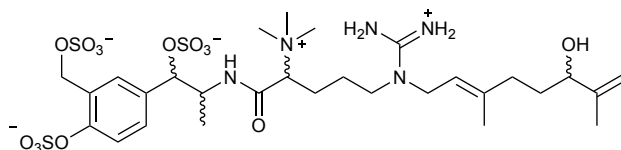

711

### 3.5.3 Nonribosomal peptides: Teleocidins

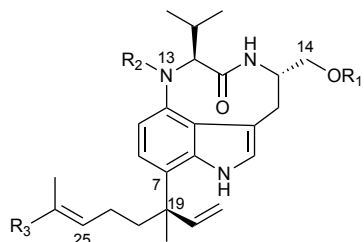

712 ( $R_1 = H, R_2 = R_3 = CH_3$ )  
 731 ( $R_1 = H, R_2 = CH_3, R_3 = COOH$ )  
 737 ( $R_1 = R_2 = H, R_3 = CH_3$ )  
 739 ( $R_1 = R_2 = R_3 = CH_3$ )

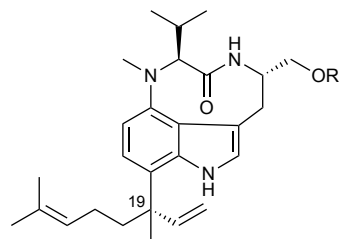

713 ( $R = H$ )  
 740 ( $R = Ac$ )

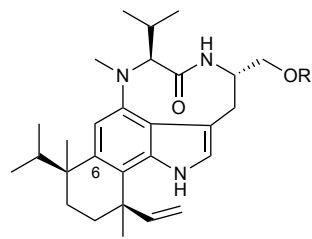

714 ( $R = H$ )  
 719 ( $R = CH_3$ )

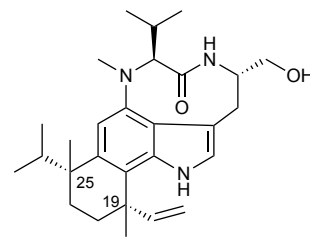

715

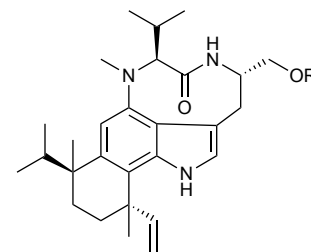

716 ( $R = H$ )  
 741 ( $R = Ac$ )

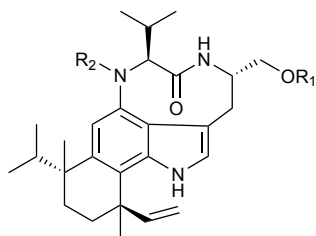

717 ( $R_1 = H, R_2 = CH_3$ )  
 718 ( $R_1 = R_2 = CH_3$ )  
 736 ( $R_1 = R_2 = H$ )

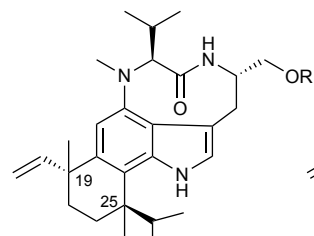

720 ( $R = CH_3$ )  
 721 ( $R = H$ )

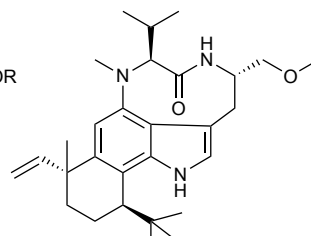

722

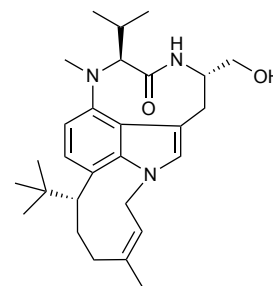

723

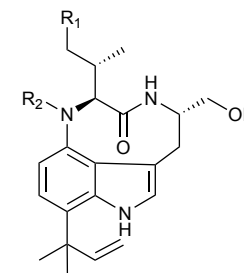

724 ( $R_1 = H, R_2 = CH_3$ )  
 726 ( $R_1 = R_2 = CH_3$ )  
 738 ( $R_1 = CH_3, R_2 = H$ )

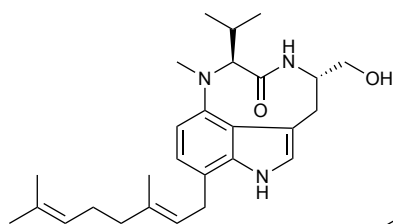

725

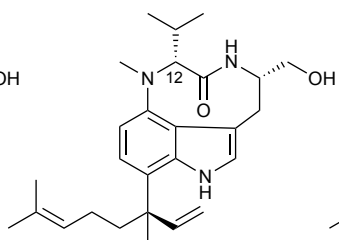

727

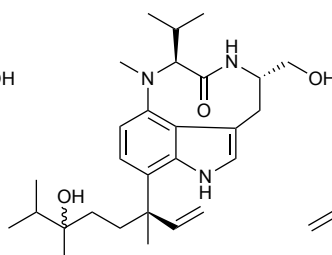

728

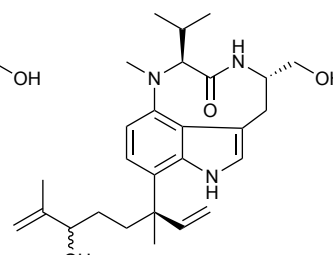

729

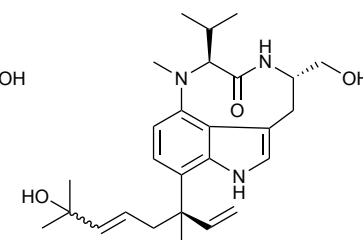

730



### 3.5.3 Nonribosomal peptides: Teleocidins

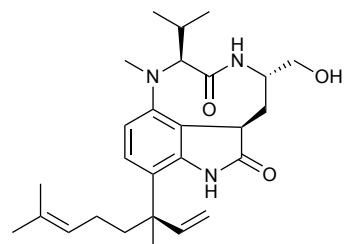

732

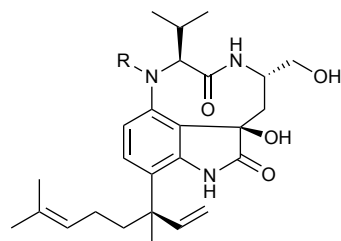

733 (R = CH<sub>3</sub>)  
734 (R = H)

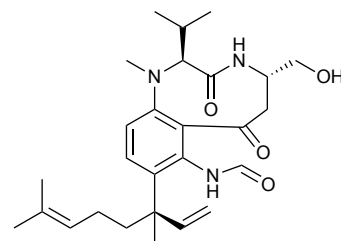

735

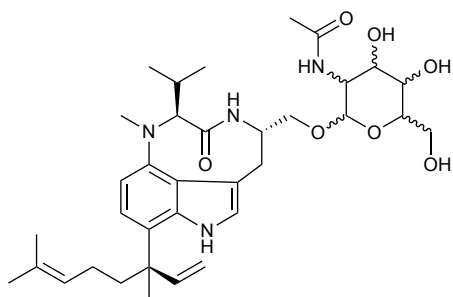

742

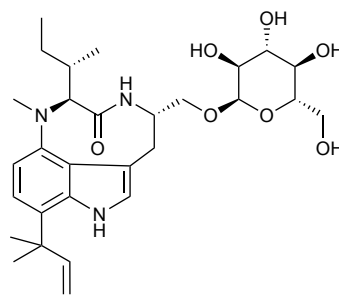

743

### 3.5.4 Diketopiperazines

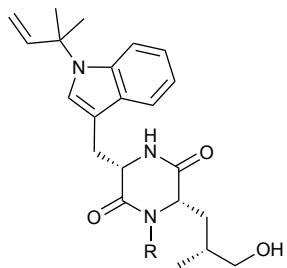

744 (R = CH<sub>3</sub>)  
745 (R = H)

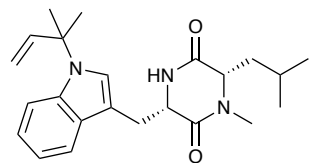

746

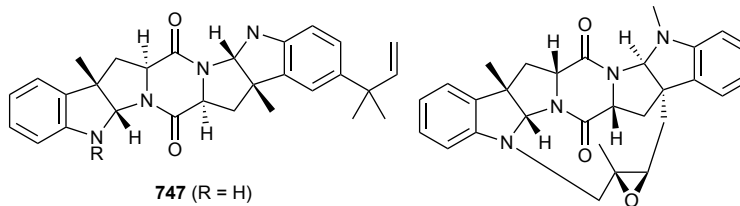

747 (R = H)  
748 (R = CH<sub>3</sub>)

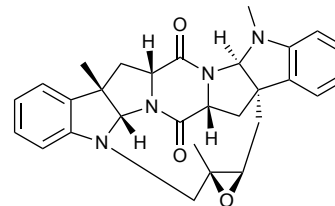

749

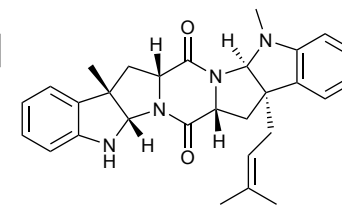

750

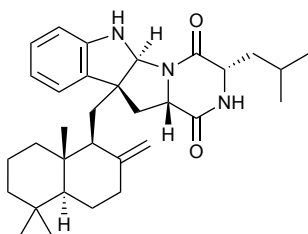

751

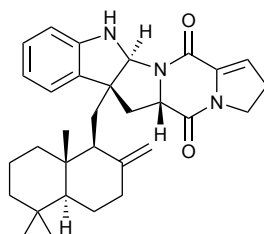

752

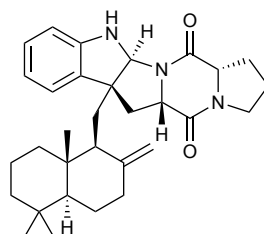

753

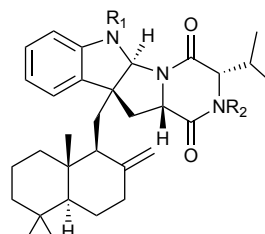

754 (R<sub>1</sub> = H, R<sub>2</sub> = CH<sub>3</sub>)  
755 (R<sub>1</sub> = R<sub>2</sub> = H)  
756 (R<sub>1</sub> = CHO, R<sub>2</sub> = CH<sub>3</sub>)

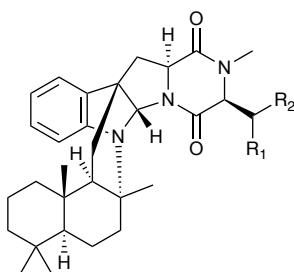

757 (R<sub>1</sub> = H, R<sub>2</sub> = CH(CH<sub>3</sub>)<sub>2</sub>)  
758 (R<sub>1</sub> = R<sub>2</sub> = CH<sub>3</sub>)

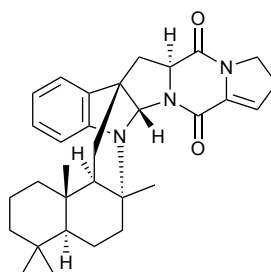

759

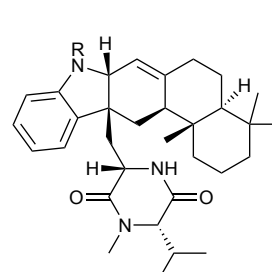

760 (R = H)  
761 (R = CHO)

### 3.6 Phenazines

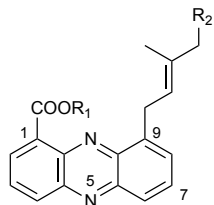

762 (R<sub>1</sub> = R<sub>2</sub> = H)

766 (R<sub>1</sub> = H, R<sub>2</sub> = OH)

780 (R<sub>1</sub> = 6-deoxy- $\alpha$ -L-talopyranose, R<sub>2</sub> = H)

781 (R<sub>1</sub> = L-rhamnose, R<sub>2</sub> = OH)

782 (R<sub>1</sub> = 2'-O-methyl-L-rhamnose, R<sub>2</sub> = OH)

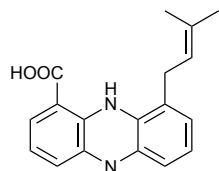

763

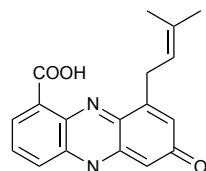

764

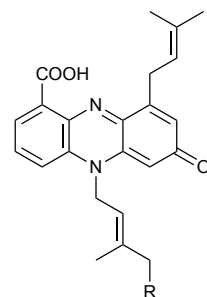

765 (R = H)

767 (R = OH)

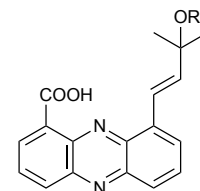

768 (R = H)

783 (R = L-rhamnose)

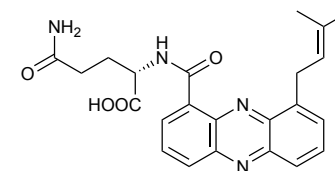

769

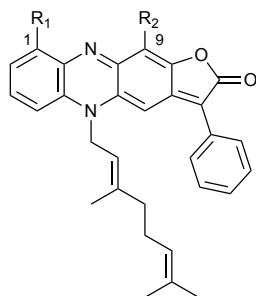

770 (R<sub>1</sub> = COOH, R<sub>2</sub> = H)

771 (R<sub>1</sub> = H, R<sub>2</sub> = COOH)

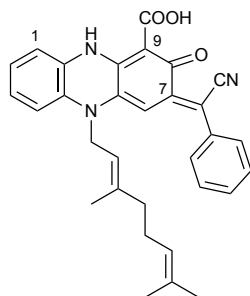

772

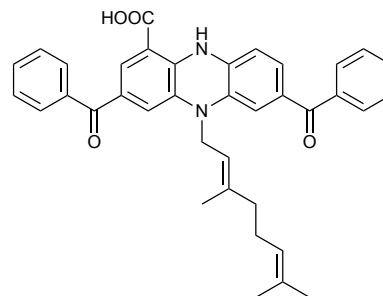

773

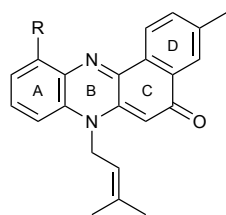

774 (R = H)

775 (R = COOH)

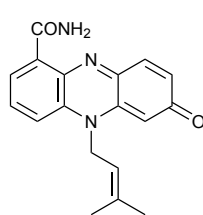

776

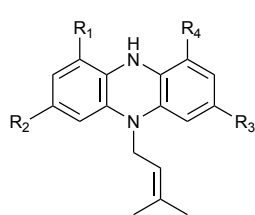

777 (R<sub>1</sub> = COOH, R<sub>2</sub> = C<sub>6</sub>H<sub>5</sub>CO-, R<sub>3</sub> = R<sub>4</sub> = H)

778 (R<sub>1</sub> = COOH, R<sub>2</sub> = R<sub>3</sub> = C<sub>6</sub>H<sub>5</sub>CO-, R<sub>4</sub> = H)

779 (R<sub>1</sub> = CONH<sub>2</sub>, R<sub>2</sub> = R<sub>3</sub> = C<sub>6</sub>H<sub>5</sub>CO-, R<sub>4</sub> = H)

784 (R<sub>1</sub> = COO-L-rhamnose, R<sub>2</sub> = R<sub>4</sub> = H, R<sub>3</sub> = C<sub>6</sub>H<sub>5</sub>CO-)

785 (R<sub>1</sub> = COO-L-rhamnose, R<sub>2</sub> = H, R<sub>3</sub> = C<sub>6</sub>H<sub>5</sub>CO-, R<sub>4</sub> = DMA)

786 (R<sub>1</sub> = COO-L-rhamnose, R<sub>2</sub> = R<sub>3</sub> = H, R<sub>4</sub> = DMA)

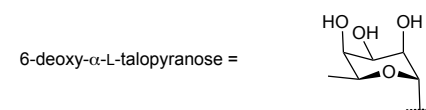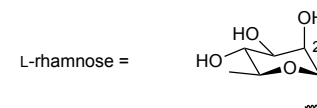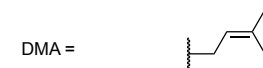

### 3.6 Phenazines

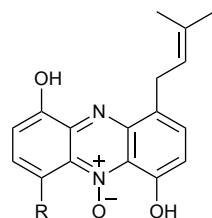

787 (R = H)  
789 (R = DMA)

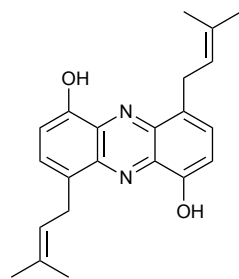

788

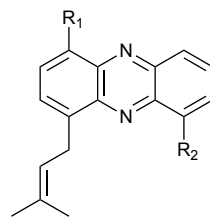

790 (R<sub>1</sub> = R<sub>2</sub> = OCH<sub>3</sub>)  
791 (R<sub>1</sub> = OCH<sub>3</sub>, R<sub>2</sub> = OH)  
792 (R<sub>1</sub> = R<sub>2</sub> = OH)  
793 (R<sub>1</sub> = OH, R<sub>2</sub> = H)

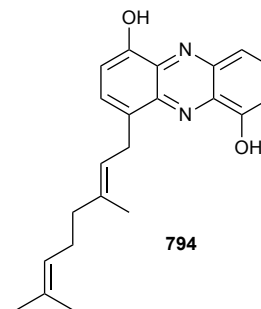

794

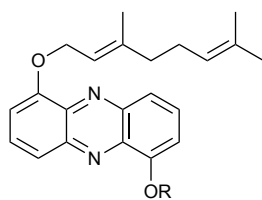

795 (R = H)  
796 B (R = CH<sub>3</sub>)

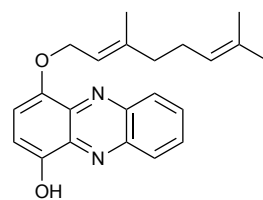

797

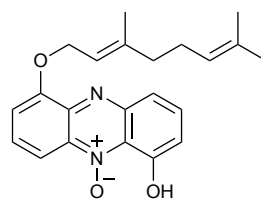

798

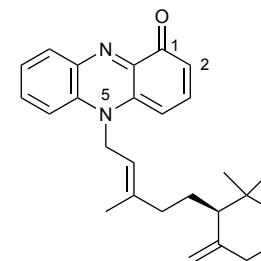

800

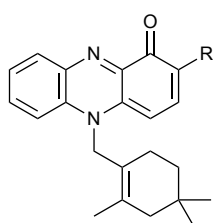

799 (R = H)  
801 (R = Cl)  
802 (R = Br)

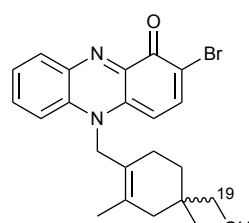

803

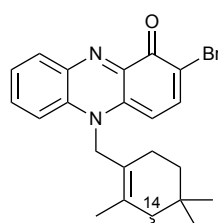

804

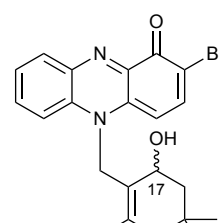

805

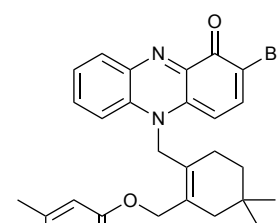

806

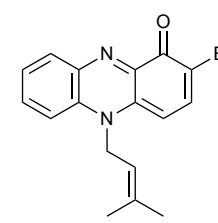

807

**3.7 Phenols**

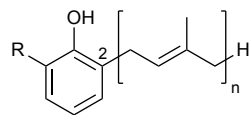

- 808 (R = H, n = 4)  
 809 (R = H, n = 9)  
 810 (R = H, n = 10)  
 811 (R = OCH<sub>3</sub>, n = 10)

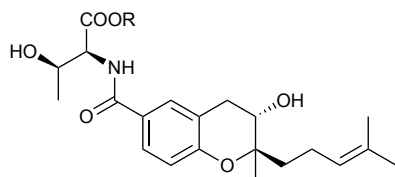

- 812 (R = H)  
 813 (R = CH<sub>3</sub>)

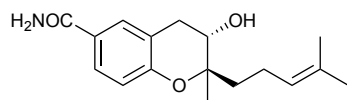

814

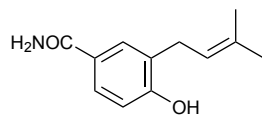

815

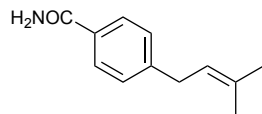

816

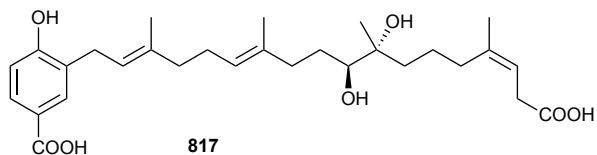

817

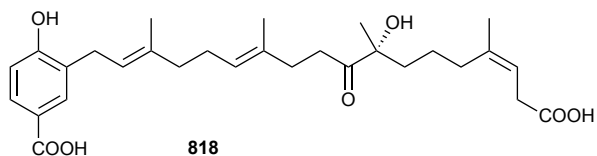

818

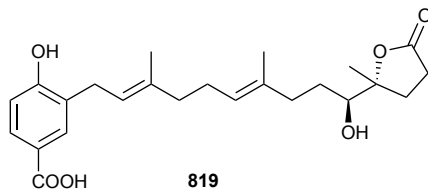

819

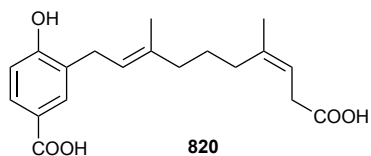

820

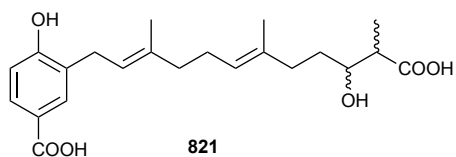

821

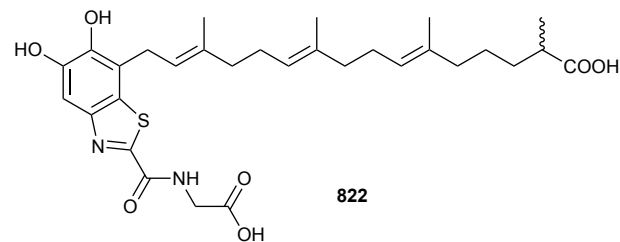

822

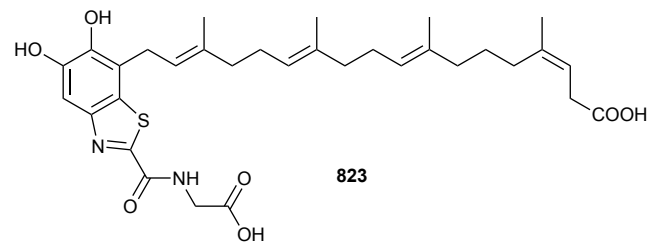

823

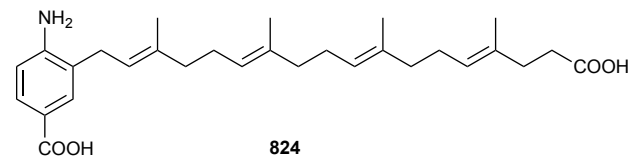

824

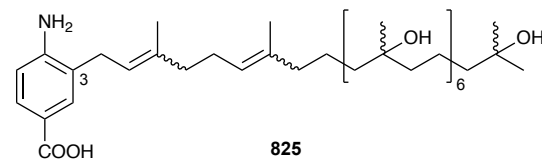

825

3.7 Phenols

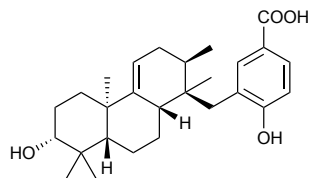

826

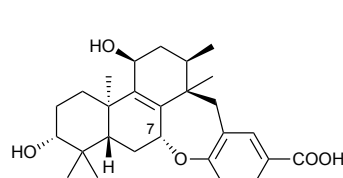

827

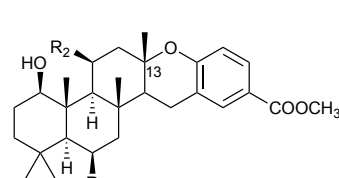

828 (R<sub>1</sub> = OH, R<sub>2</sub> = H)  
829 (R<sub>1</sub> = R<sub>2</sub> = H)  
830 (R<sub>1</sub> = R<sub>2</sub> = OH)

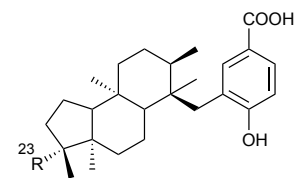

831 (R = CH<sub>2</sub>OH)  
832 (R = CHO)  
833 (R = COOH)

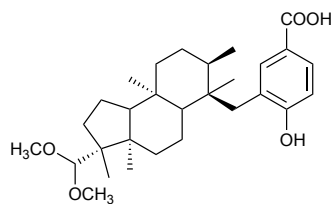

834

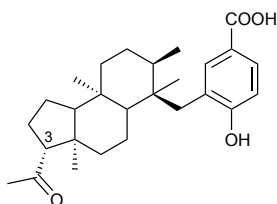

835

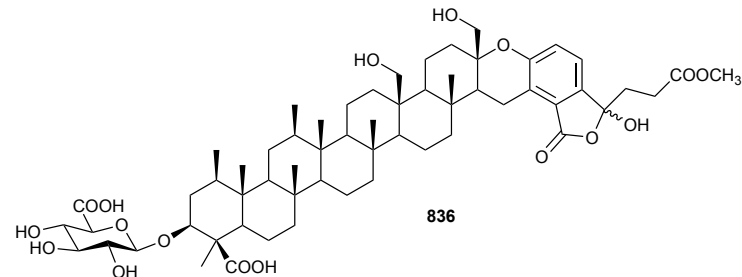

836

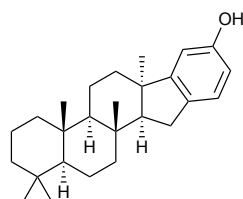

837

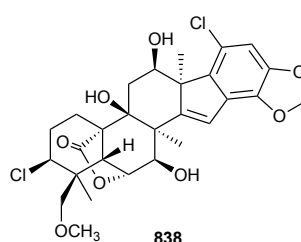

838

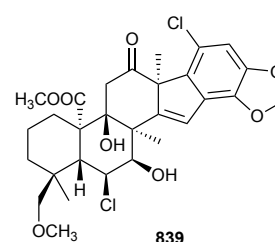

839

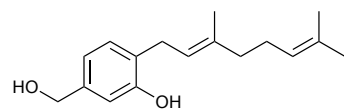

840

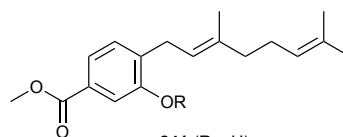

841 (R = H)  
842 (R = CH<sub>3</sub>)

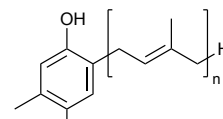

843 (n = 3)  
846 (n = 2)

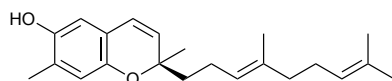

844

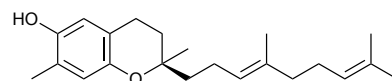

845

### 3.8.1 Polyketides: Flavonoids

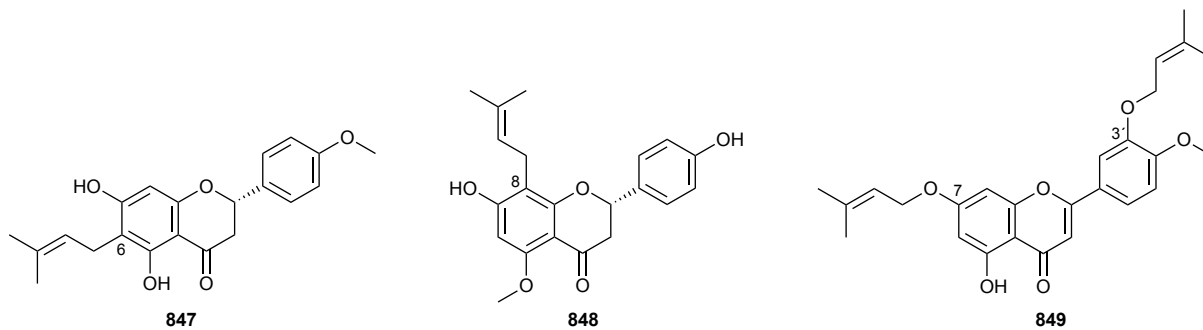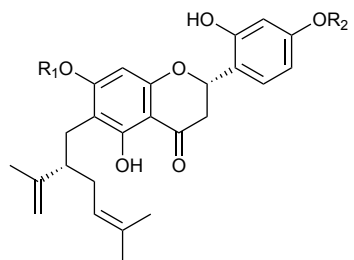

850 (R<sub>1</sub> = R<sub>2</sub> = H)  
851 (R<sub>1</sub> = CH<sub>3</sub>, R<sub>2</sub> = H)  
852 (R<sub>1</sub> = R<sub>2</sub> = CH<sub>3</sub>)

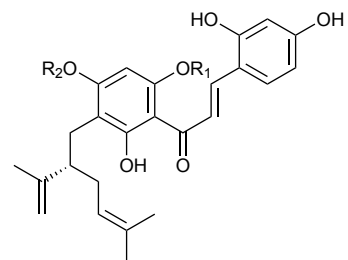

853 (R<sub>1</sub> = CH<sub>3</sub>, R<sub>2</sub> = H)  
854 (R<sub>1</sub> = H, R<sub>2</sub> = CH<sub>3</sub>)

### 3.8.2 Polyketides: Furaquinocins

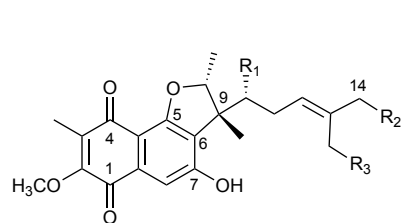

**855** ( $R_1 = R_3 = \text{OH}, R_2 = \text{H}$ )

**856** ( $R_1 = R_2 = \text{OH}, R_3 = \text{H}$ )

**857** ( $R_1 = R_2 = R_3 = \text{H}$ )

**858** ( $R_1 = \text{OH}, R_2 = R_3 = \text{H}$ )

**859** ( $R_1 = R_3 = \text{H}, R_2 = \text{OH}$ )

**860** ( $R_1 = R_2 = R_3 = \text{OH}$ )

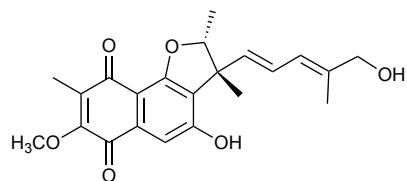

**861**

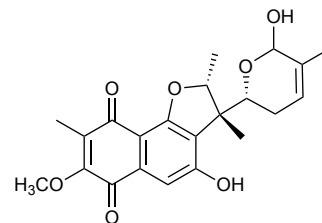

**862**

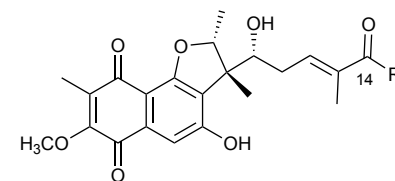

**863** ( $R = \text{OH}$ )

**864** ( $R = \text{NH}_2$ )

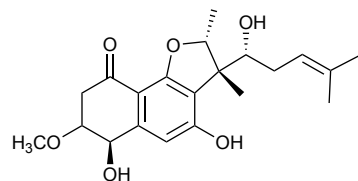

**865**

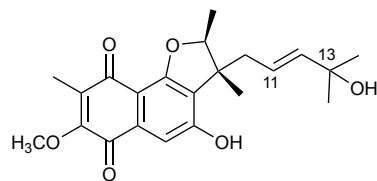

**866**

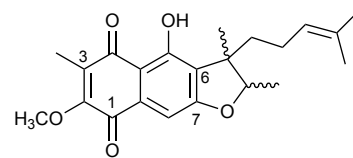

**867**

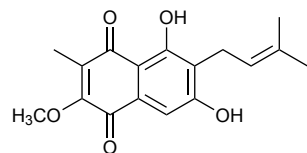

**868**

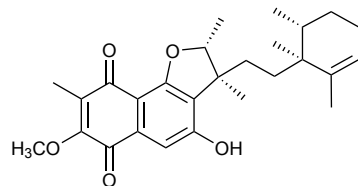

**869**

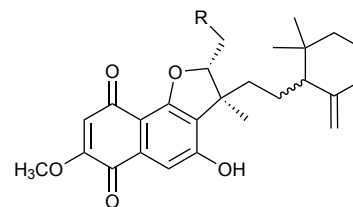

**870** ( $R = \text{H}$ )

**872** ( $R = \text{OH}$ )

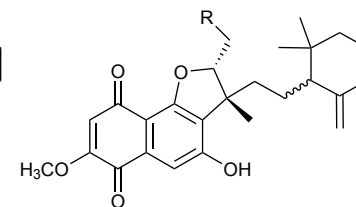

**871** ( $R = \text{H}$ )

**873** ( $R = \text{OH}$ )



### 3.8.3.1 Polyketides: Napyradiomycins type A

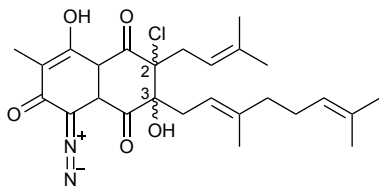

880

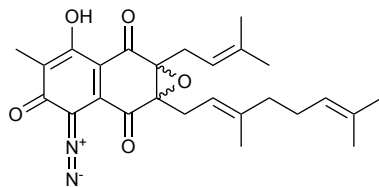

881

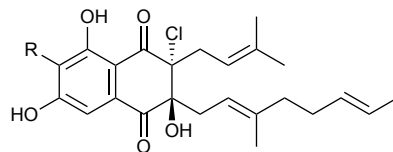

882 (R = CH<sub>3</sub>)  
888 (R = H)

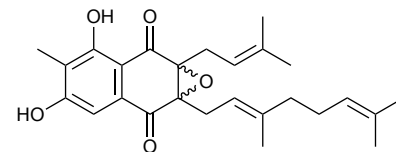

883

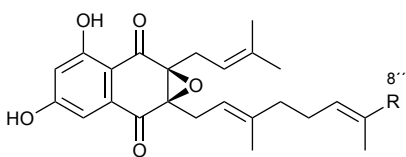

886 (R = CH<sub>3</sub>)  
887 (R = COOH)

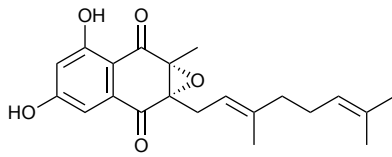

889

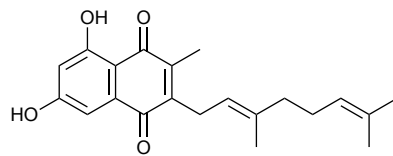

890

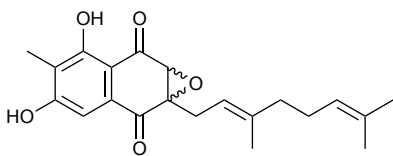

891

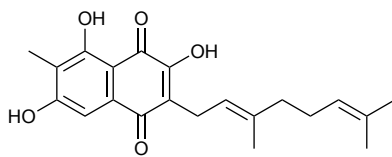

892

### 3.8.3.2 Polyketides: Napyradiomycins type B

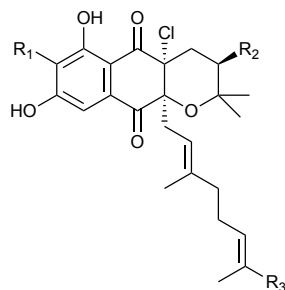

874 (R<sub>1</sub> = H, R<sub>2</sub> = Cl, R<sub>3</sub> = CH<sub>3</sub>)  
 885 (R<sub>1</sub> = R<sub>3</sub> = CH<sub>3</sub>, R<sub>2</sub> = Cl)  
 896 (R<sub>1</sub> = R<sub>3</sub> = CH<sub>3</sub>, R<sub>2</sub> = Br)  
 897 (R<sub>1</sub> = H, R<sub>2</sub> = Br, R<sub>3</sub> = CH<sub>3</sub>)  
 898 (R<sub>1</sub> = H, R<sub>2</sub> = Cl, R<sub>3</sub> = CH<sub>2</sub>OH)  
 899 (R<sub>1</sub> = H, R<sub>2</sub> = Cl, R<sub>3</sub> = CHO)

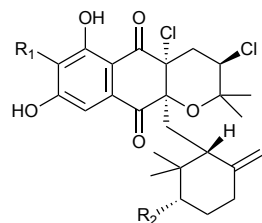

875 (R<sub>1</sub> = H, R<sub>2</sub> = Cl)  
 877 (R<sub>1</sub> = H, R<sub>2</sub> = Br)  
 906 (R<sub>1</sub> = CH<sub>3</sub>, R<sub>2</sub> = Cl)

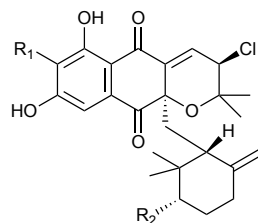

876 (R<sub>1</sub> = H, R<sub>2</sub> = Cl)  
 910 (R<sub>1</sub> = CH<sub>3</sub>, R<sub>2</sub> = Cl)  
 911 (R<sub>1</sub> = H, R<sub>2</sub> = Br)

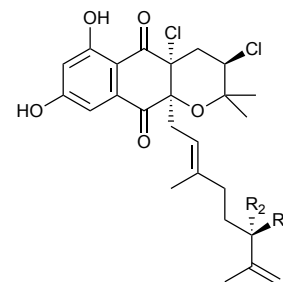

893 (R<sub>1</sub> = OH, R<sub>2</sub> = H)  
 894 (R<sub>1</sub> = H, R<sub>2</sub> = OH)

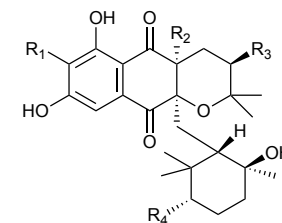

895 (R<sub>1</sub> = H, R<sub>2</sub> = R<sub>3</sub> = R<sub>4</sub> = Cl)  
 907 (R<sub>1</sub> = CH<sub>3</sub>, R<sub>2</sub> = R<sub>3</sub> = R<sub>4</sub> = Cl)  
 912 (R<sub>1</sub> = CH<sub>3</sub>, R<sub>2</sub> = H, R<sub>3</sub> = R<sub>4</sub> = Cl)  
 913 (R<sub>1</sub> = CH<sub>3</sub>, R<sub>2</sub> = Cl, R<sub>3</sub> = R<sub>4</sub> = Br)  
 914 (R<sub>1</sub> = R<sub>2</sub> = H, R<sub>3</sub> = R<sub>4</sub> = Cl)  
 915 (R<sub>1</sub> = H, R<sub>2</sub> = OH, R<sub>3</sub> = R<sub>4</sub> = Cl)

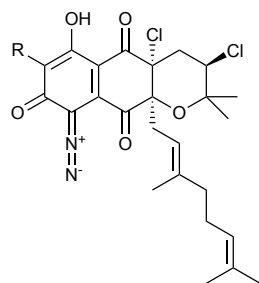

900 (R = H)  
 884 (R = CH<sub>3</sub>)

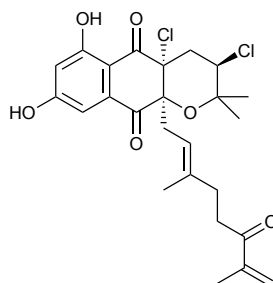

901

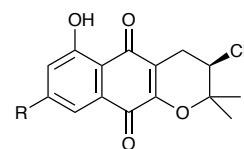

902 (R = OH)  
 903 (R = OCH<sub>3</sub>)

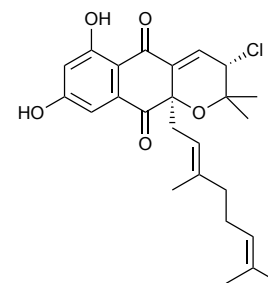

904 (R = β-Cl)  
 905 (R = α-OH)

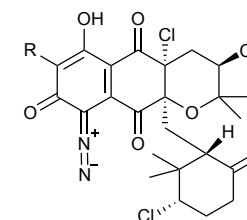

908 (R = CH<sub>3</sub>)  
 920 (R = H)

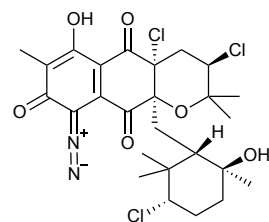

909

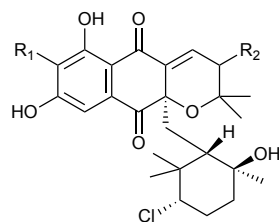

916 (R<sub>1</sub> = CH<sub>3</sub>, R<sub>2</sub> = β-Cl)  
 917 (R<sub>1</sub> = H, R<sub>2</sub> = α-OH)  
 918 (R<sub>1</sub> = H, R<sub>2</sub> = β-Cl)  
 919 (R<sub>1</sub> = H, R<sub>2</sub> = α-Cl)

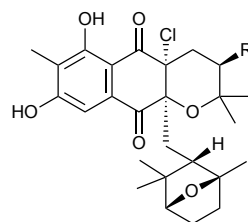

921 (R = Cl)  
 922 (R = Br)

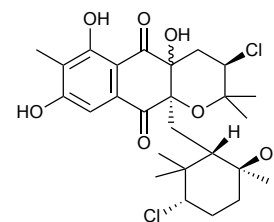

923

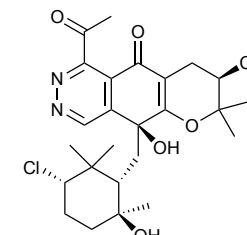

931

### 3.8.3.3 Polyketides: Napyradiomycins type C

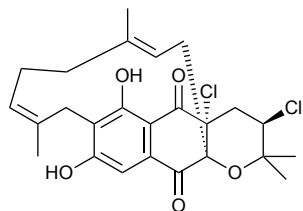

878

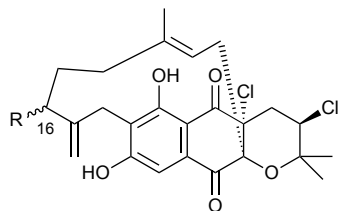

879 (R = Cl)  
927 (R = OH)

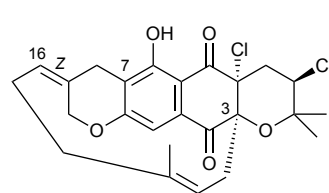

924

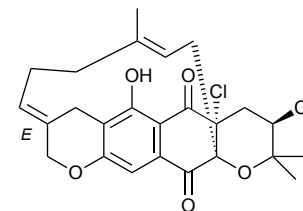

925

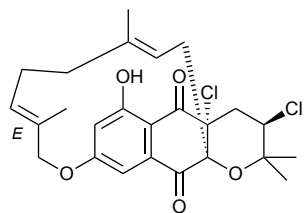

926

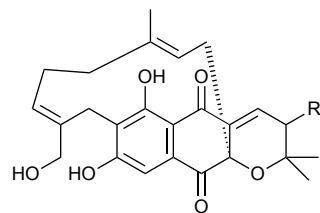

928 (R =  $\beta$ -Cl)  
929 (R =  $\alpha$ -OH)

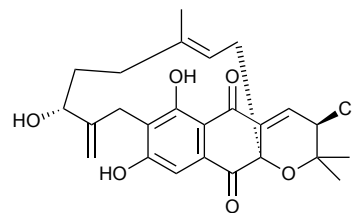

930

### 3.8.4 Polyketides: Naphterpins

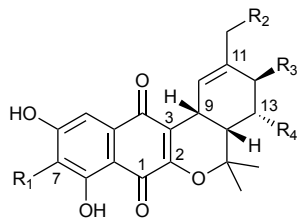

- 932** ( $R_1 = \text{CH}_3, R_2 = R_3 = R_4 = \text{H}$ )  
**935** ( $R_1 = \text{CH}_3, R_2 = R_4 = \text{H}, R_3 = \text{OH}$ )  
**936** ( $R_1 = \text{CH}_3, R_2 = R_4 = \text{H}, R_3 = \text{OAc}$ )  
**937** ( $R_1 = R_2 = R_3 = R_4 = \text{H}$ )  
**938** ( $R_1 = R_3 = R_4 = \text{H}, R_2 = \text{OH}$ )  
**939** ( $R_1 = R_4 = \text{H}, R_2 = R_3 = \text{OH}$ )  
**940** ( $R_1 = \text{H}, R_2 = R_3 = R_4 = \text{OH}$ )

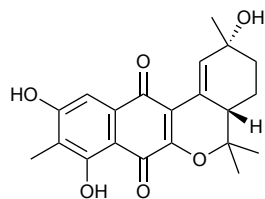

**933**

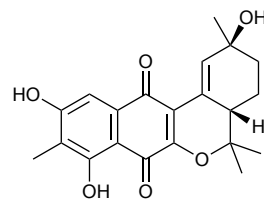

**934**

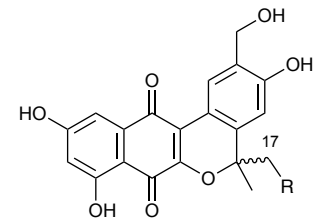

**941** ( $R = \text{H}$ )  
**942** ( $R = \text{OH}$ )

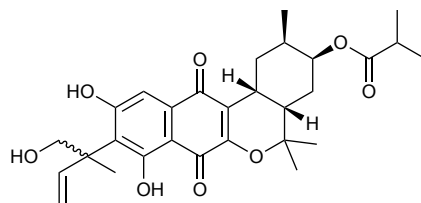

**943**

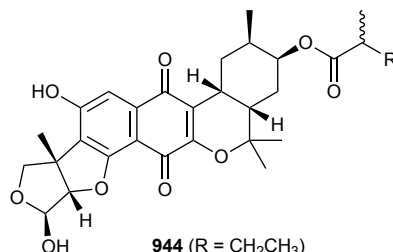

**944** ( $R = \text{CH}_2\text{CH}_3$ )  
**945** ( $R = \text{CH}_3$ )

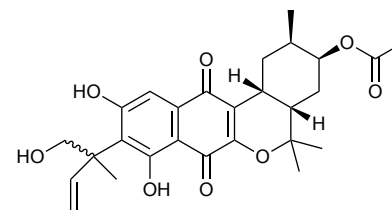

**946**

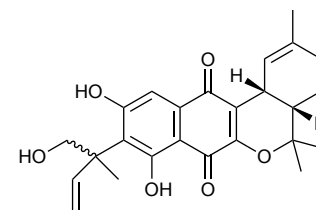

**947**

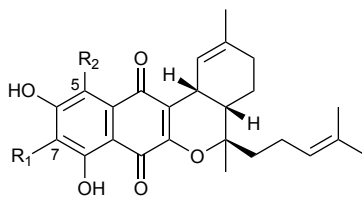

- 948** ( $R_1 = \text{H}, R_2 = \text{Br}$ )  
**949** ( $R_1 = \text{Br}, R_2 = \text{H}$ )  
**950** ( $R_1 = R_2 = \text{H}$ )

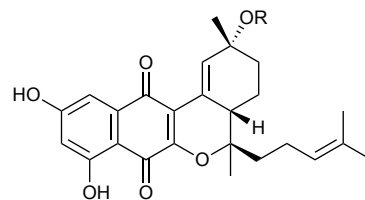

- 951** ( $R = \text{H}$ )  
**952** ( $R = \text{CH}_3$ )

### 3.8.5 Polyketides: Merochlorins

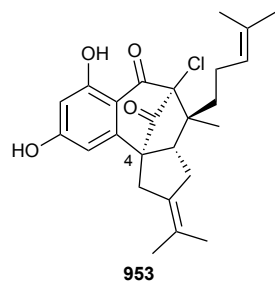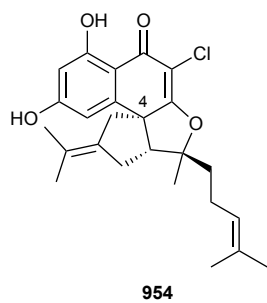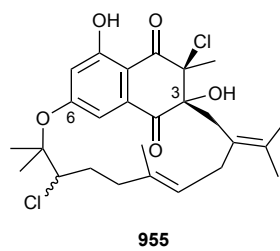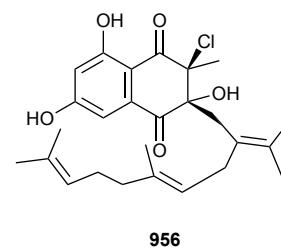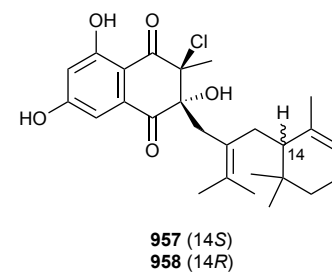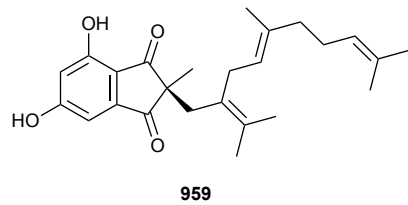

3.8.6 Polyketides: Miscellaneous polyketides

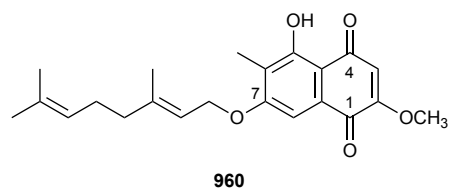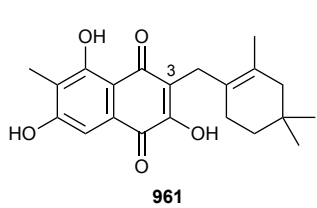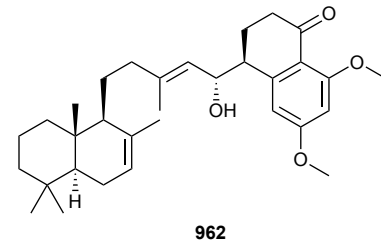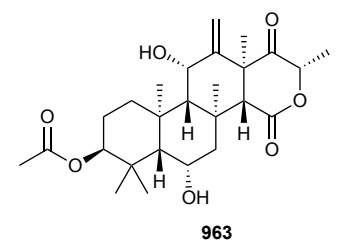

3.9 Pyrroles

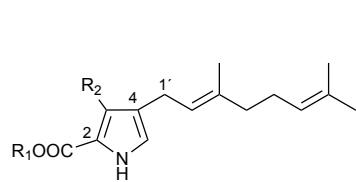

**964** ( $R_1 = H, R_2 = H$ )  
**965** ( $R_1 = CH_3, R_2 = NHCOCH_3$ )

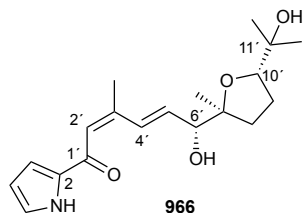

**966**

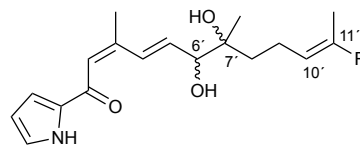

**967** ( $R = H$ )  
**969** ( $R = CH_2OH$ )  
**970** ( $R = CHO$ )

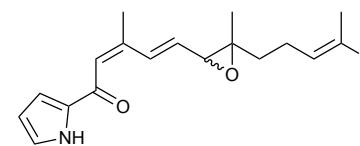

**968** ( $R = CH_3$ )  
**971** ( $R = CH_2OH$ )  
**972** ( $R = CHO$ )

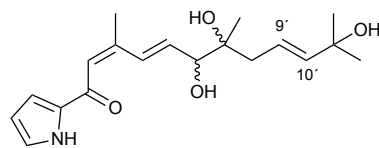

**973**

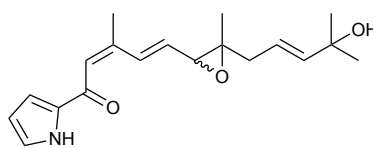

**974**

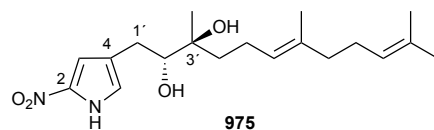

**975**

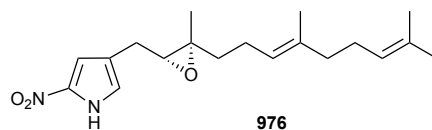

**976**

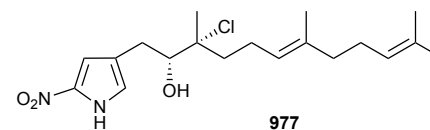

**977**

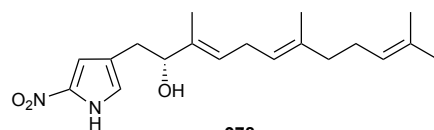

**978**

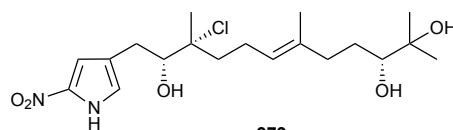

**979**

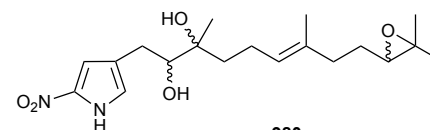

**980**

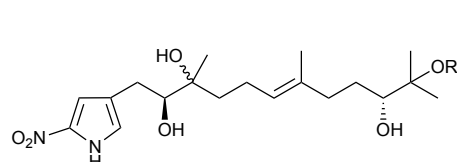

**981** ( $R = CH_3$ )  
**982** ( $R = H$ )

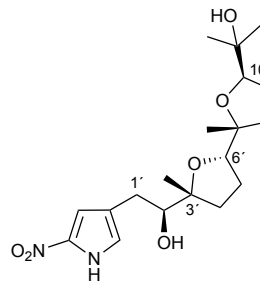

**983**

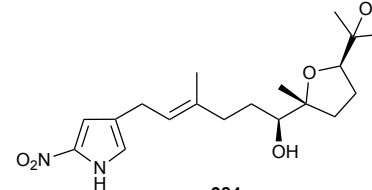

**984**

### 3.10 Quinolines

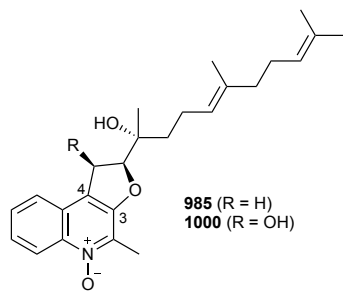

**985** (R = H)  
**1000** (R = OH)

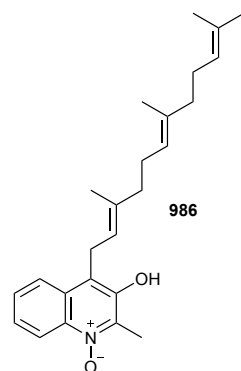

**986**

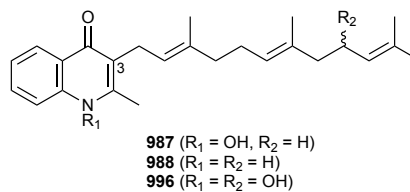

**987** (R<sub>1</sub> = OH, R<sub>2</sub> = H)  
**988** (R<sub>1</sub> = R<sub>2</sub> = H)  
**996** (R<sub>1</sub> = R<sub>2</sub> = OH)

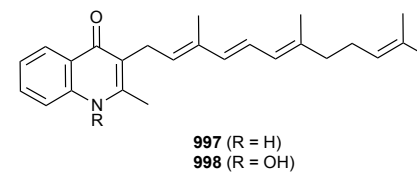

**997** (R = H)  
**998** (R = OH)

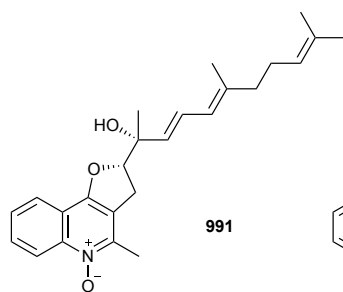

**991**

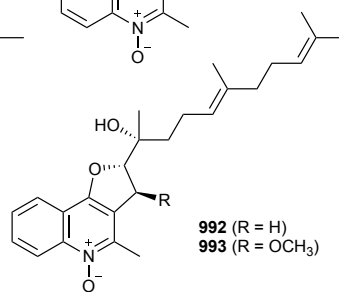

**992** (R = H)  
**993** (R = OCH<sub>3</sub>)

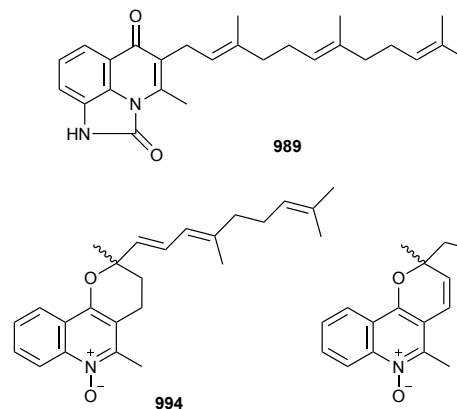

**989**

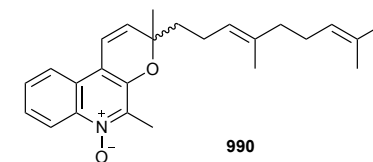

**990**

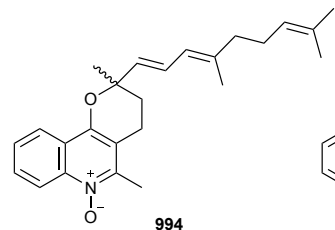

**994**

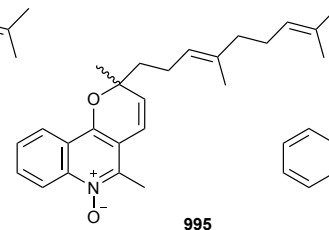

**995**

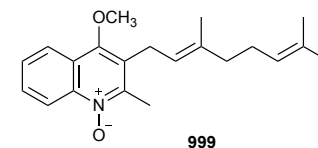

**999**

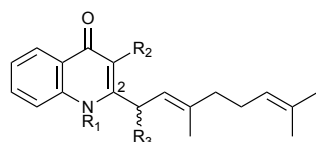

**1001** (R<sub>1</sub> = R<sub>3</sub> = H, R<sub>2</sub> = CH<sub>3</sub>)  
**1002** (R<sub>1</sub> = R<sub>2</sub> = CH<sub>3</sub>, R<sub>3</sub> = H)  
**1003** (R<sub>1</sub> = CH<sub>2</sub>SCH<sub>3</sub>, R<sub>2</sub> = CH<sub>3</sub>, R<sub>3</sub> = H)  
**1004** (R<sub>1</sub> = R<sub>2</sub> = R<sub>3</sub> = H)  
**1005** (R<sub>1</sub> = CH<sub>3</sub>, R<sub>2</sub> = R<sub>3</sub> = H)  
**1006** (R<sub>1</sub> = CH<sub>3</sub>, R<sub>2</sub> = H, R<sub>3</sub> = OH)

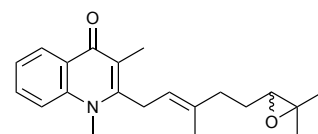

**1007**

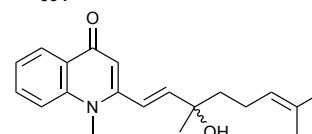

**1008**

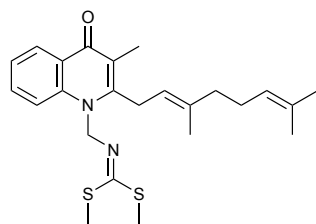

**1009**

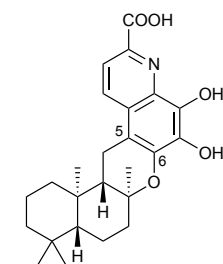

**1010**

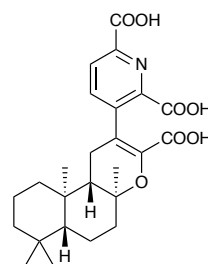

**1011**

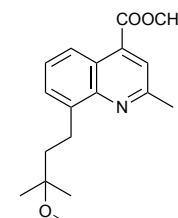

**1012**



### 3.11.1 Quinones: Benzoquinones

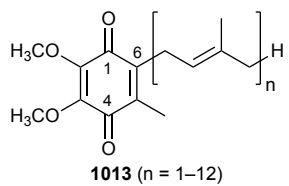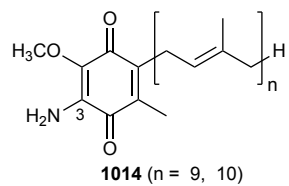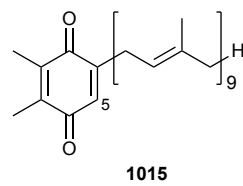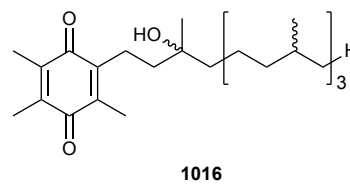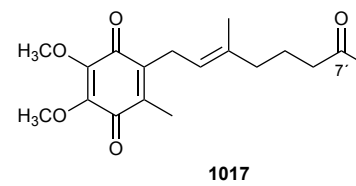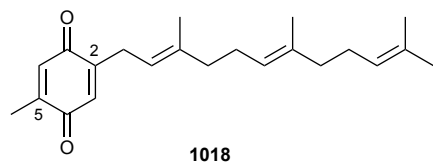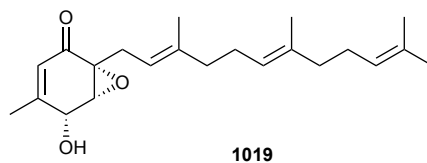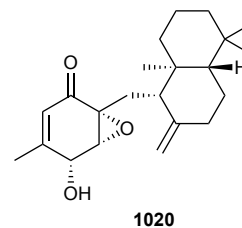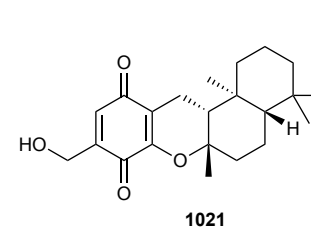

### 3.11.2 Quinones: Naphthoquinones

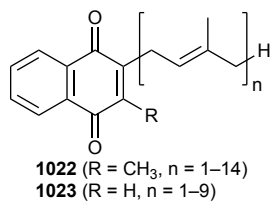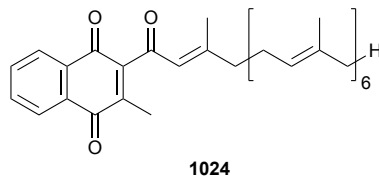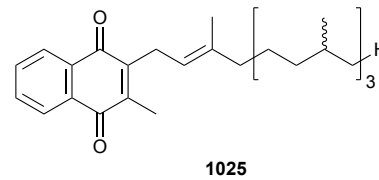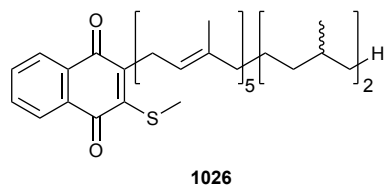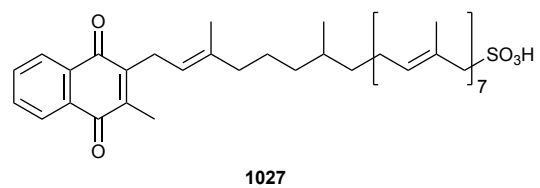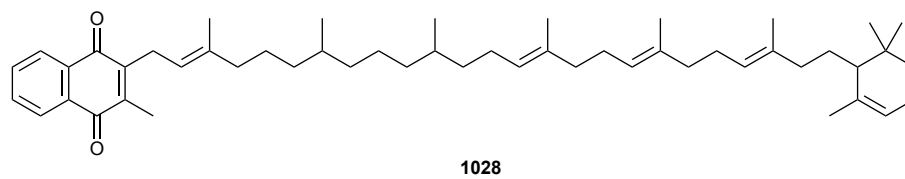

3.12.1 Miscellaneous: Dibenzodiazepinones

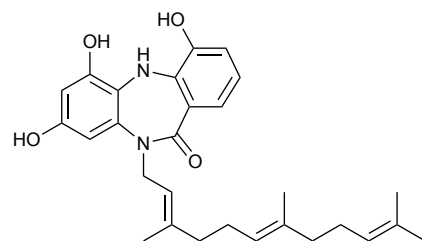

1029

3.12.2 Miscellaneous: Flavins

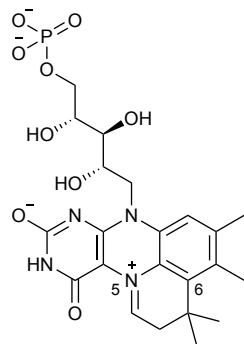

1030

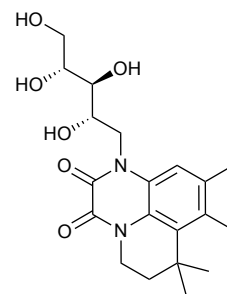

1031

### 3.12.3 Miscellaneous: Phosphoglycolipids

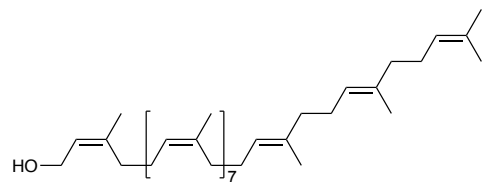

1032

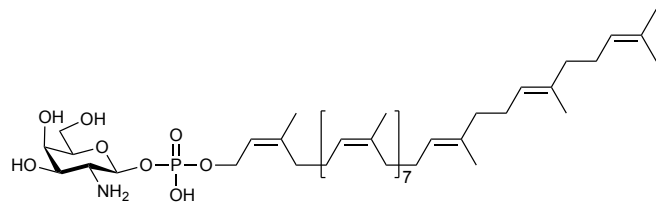

1033

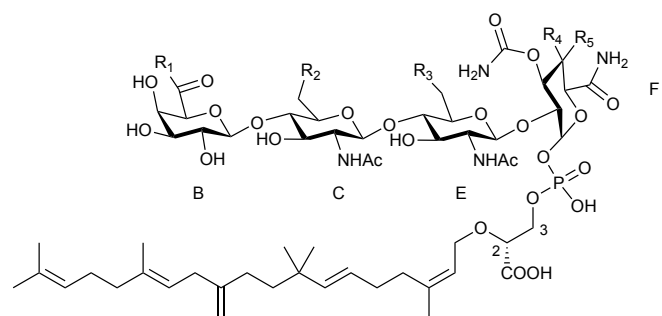

F

acpd =

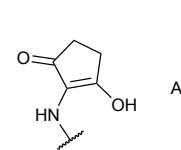

A

D-glucose =

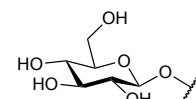

D

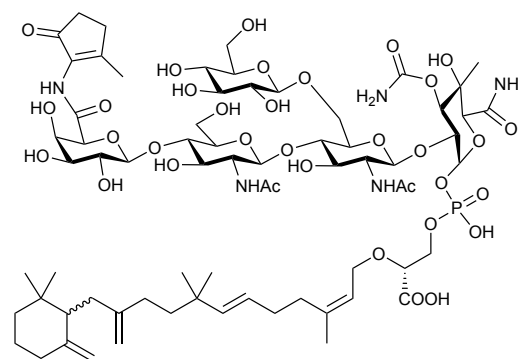

1044

- 1034 ( $R_1 = \text{acpd}$ ,  $R_2 = \text{H}$ ,  $R_3 = \text{D-glucose}$ ,  $R_4 = \text{OH}$ ,  $R_5 = \text{CH}_3$ )  
 1035 ( $R_1 = \text{acpd}$ ,  $R_2 = R_4 = \text{H}$ ,  $R_3 = \text{D-glucose}$ ,  $R_5 = \text{OH}$ )  
 1036 ( $R_1 = \text{acpd}$ ,  $R_2 = R_3 = R_4 = \text{H}$ ,  $R_5 = \text{OH}$ )  
 1037 ( $R_1 = \text{acpd}$ ,  $R_2 = R_3 = \text{H}$ ,  $R_4 = \text{OH}$ ,  $R_5 = \text{CH}_3$ )  
 1038 ( $R_1 = \text{acpd}$ ,  $R_2 = \text{H}$ ,  $R_3 = R_4 = \text{OH}$ ,  $R_5 = \text{CH}_3$ )  
 1039 ( $R_1 = R_4 = \text{OH}$ ,  $R_2 = \text{H}$ ,  $R_3 = \text{D-glucose}$ ,  $R_5 = \text{CH}_3$ )  
 1040 ( $R_1 = \text{NH}_2$ ,  $R_2 = \text{H}$ ,  $R_3 = \text{D-glucose}$ ,  $R_4 = \text{OH}$ ,  $R_5 = \text{CH}_3$ )  
 1041 ( $R_1 = R_3 = R_4 = \text{OH}$ ,  $R_2 = \text{H}$ ,  $R_5 = \text{CH}_3$ )  
 1042 ( $R_1 = \text{NH}_2$ ,  $R_2 = \text{H}$ ,  $R_3 = R_4 = \text{OH}$ ,  $R_5 = \text{CH}_3$ )  
 1043 ( $R_1 = \text{acpd}$ ,  $R_2 = R_3 = R_4 = \text{OH}$ ,  $R_5 = \text{CH}_3$ )

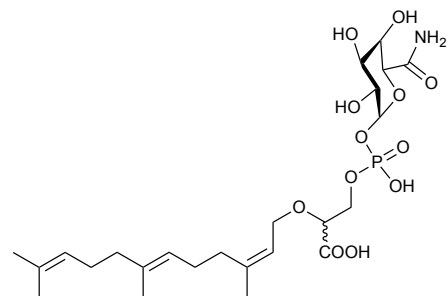

1045

3.12.4 Miscellaneous: Saccharides

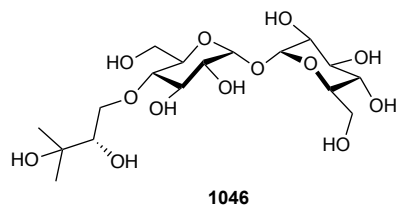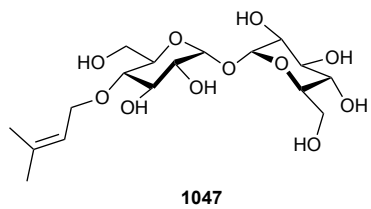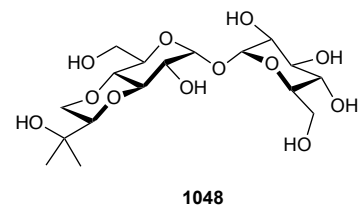

### 3.12.5 Miscellaneous: Chlorophylls

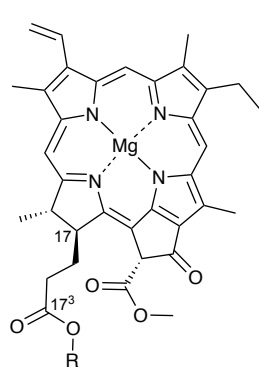

**1049** (R = p)  
**1060** (R = pd)

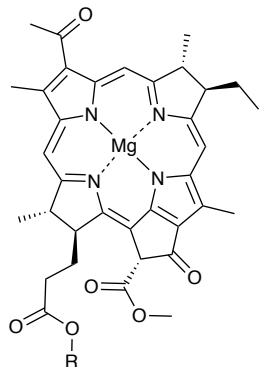

**1050** (R = p)  
**1056** (R = gg)  
**1057** (R = dhgg)  
**1058** (R = thgg)

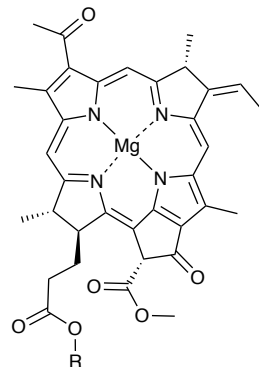

**1051** (R = p)

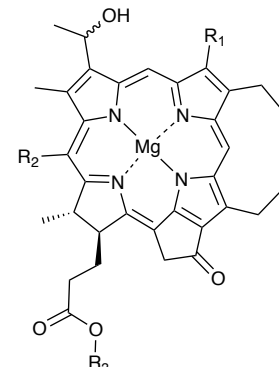

**1052** (R<sub>1</sub> = R<sub>2</sub> = CH<sub>3</sub>, R<sub>3</sub> = f)  
**1053** (R<sub>1</sub> = CH<sub>3</sub>, R<sub>2</sub> = H, R<sub>3</sub> = f)  
**1054** (R<sub>1</sub> = CHO, R<sub>2</sub> = H, R<sub>3</sub> = f)

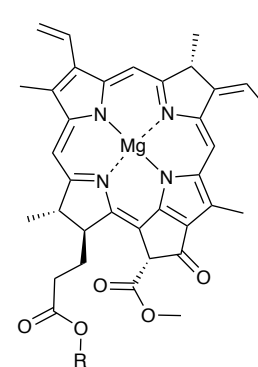

**1055** (R = f)  
**1059** (R = gg)

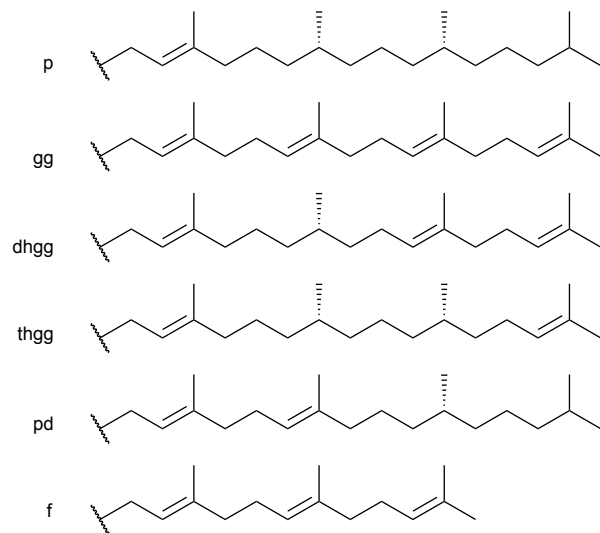

3.12.6 Miscellaneous: Hemes

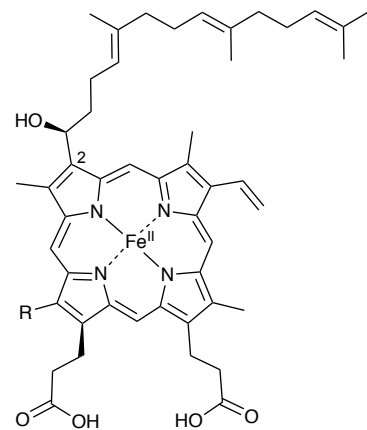

**1061** (R = CHO)  
**1062** (R = CH<sub>3</sub>)
